# Supplementary material for: Total synthesis of desacetylumuravumbolide, umuravumbolide and their biological evaluation
Source: Royal Society of Chemistry journal article supplement (doi:10.1039/c2ra20830j), 2012-01-01

## Supporting Information for:

### Total Synthesis of Desacetylmuravumbolide, Umuravumbolide and their Biological Evaluation

Gowravaram Sabitha,<sup>a,\*</sup> D. Vasudeva Reddy,<sup>a</sup> S. Siva Sankara Reddy,<sup>a</sup> J. S. Yadav<sup>a</sup> and C.  
Ganesh Kumar<sup>b</sup> and Pombala Sujitha<sup>b</sup>

<sup>a</sup>Natural Products Chemistry Division, <sup>b</sup>Chemical Biology Laboratory, CSIR-Indian Institute of Chemical  
Technology, Hyderabad 500 607, India. E-mail: [gowravaramsr@yahoo.com](mailto:gowravaramsr@yahoo.com), [sabitha@iict.res.in](mailto:sabitha@iict.res.in); Fax: +91-40-  
27160512

<sup>1</sup>H NMR and <sup>13</sup>C NMR Spectra of All New Compounds

S2 – S25

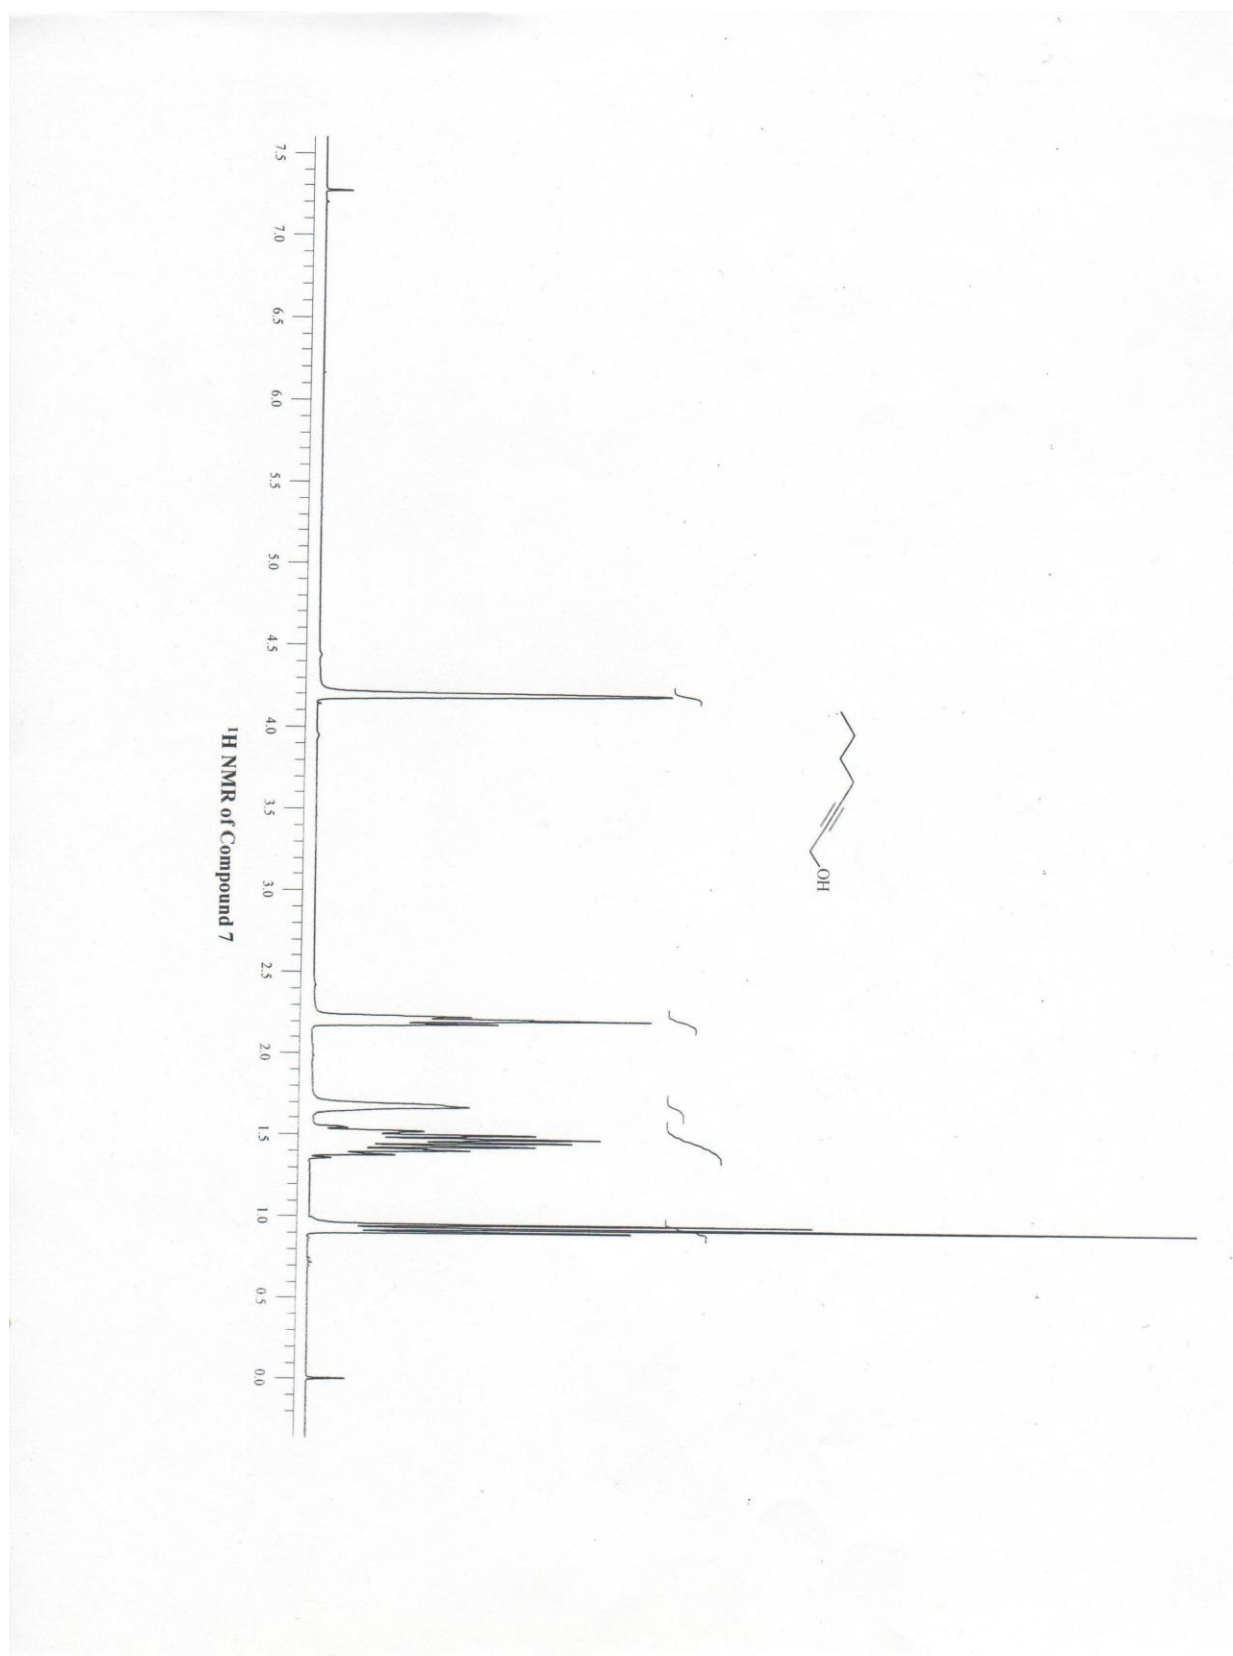

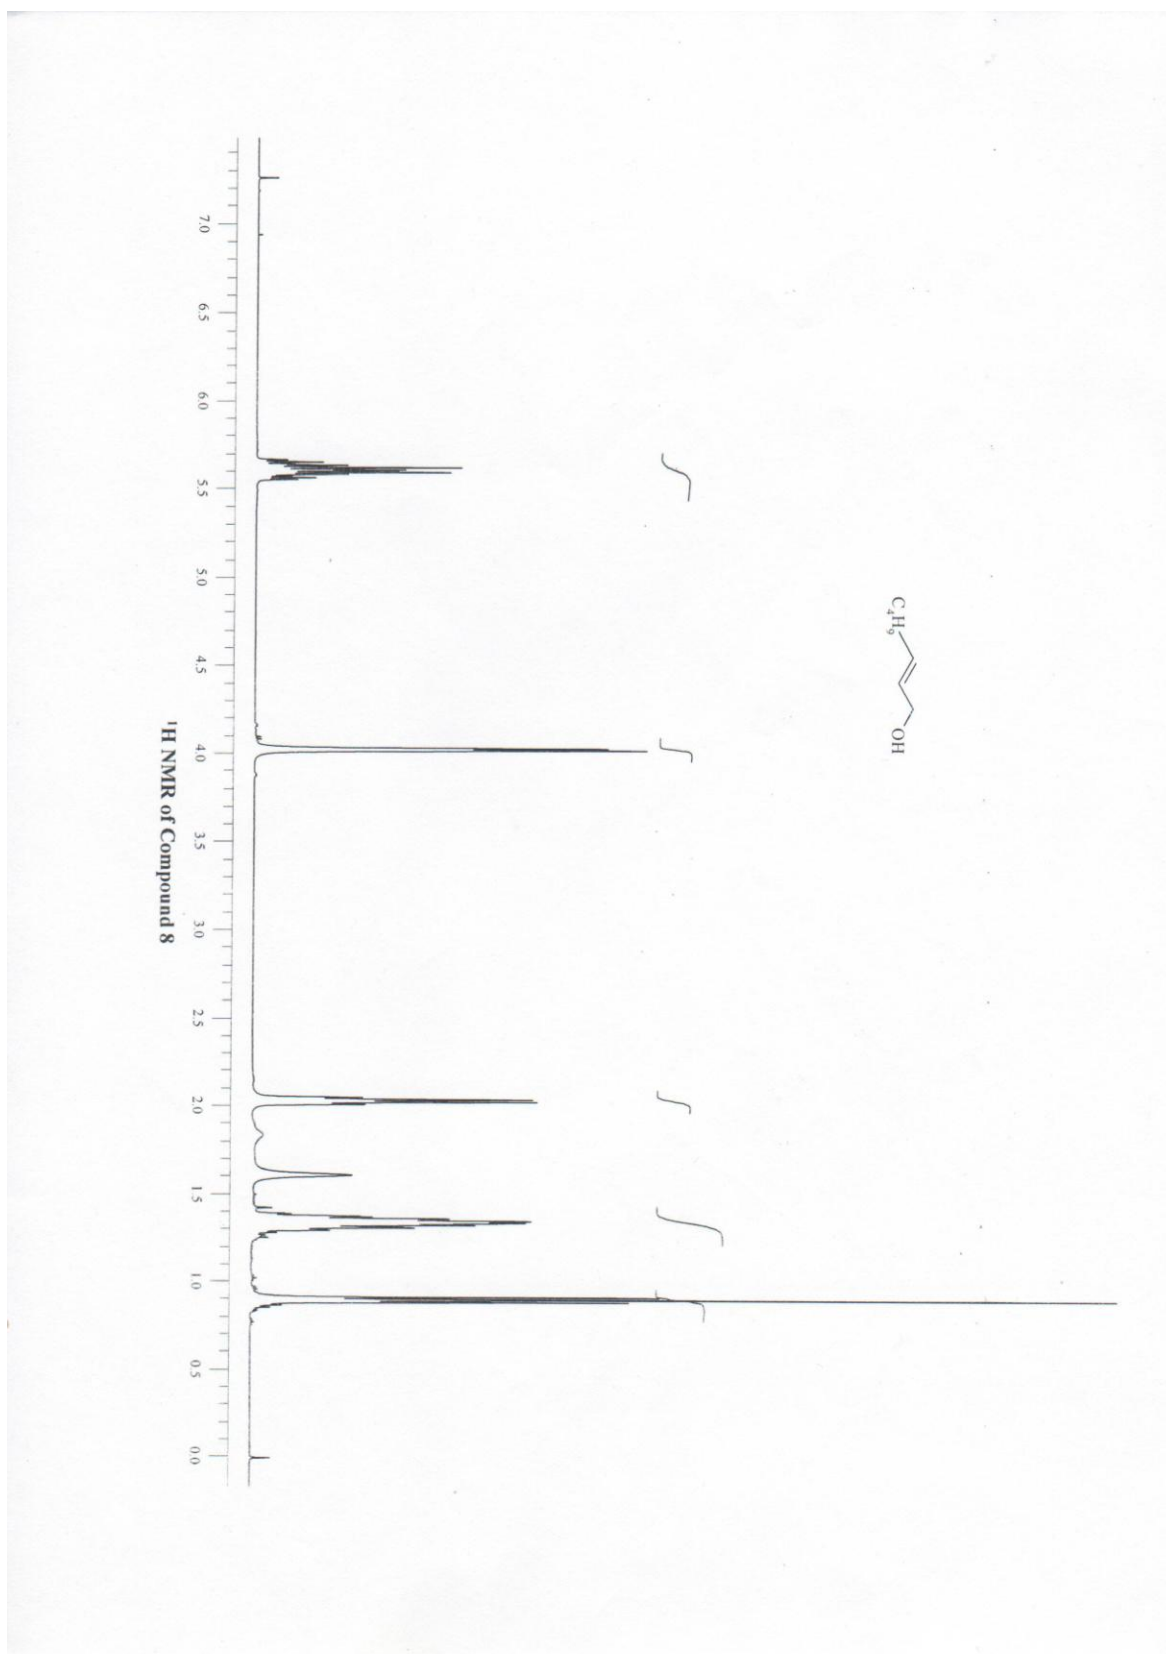

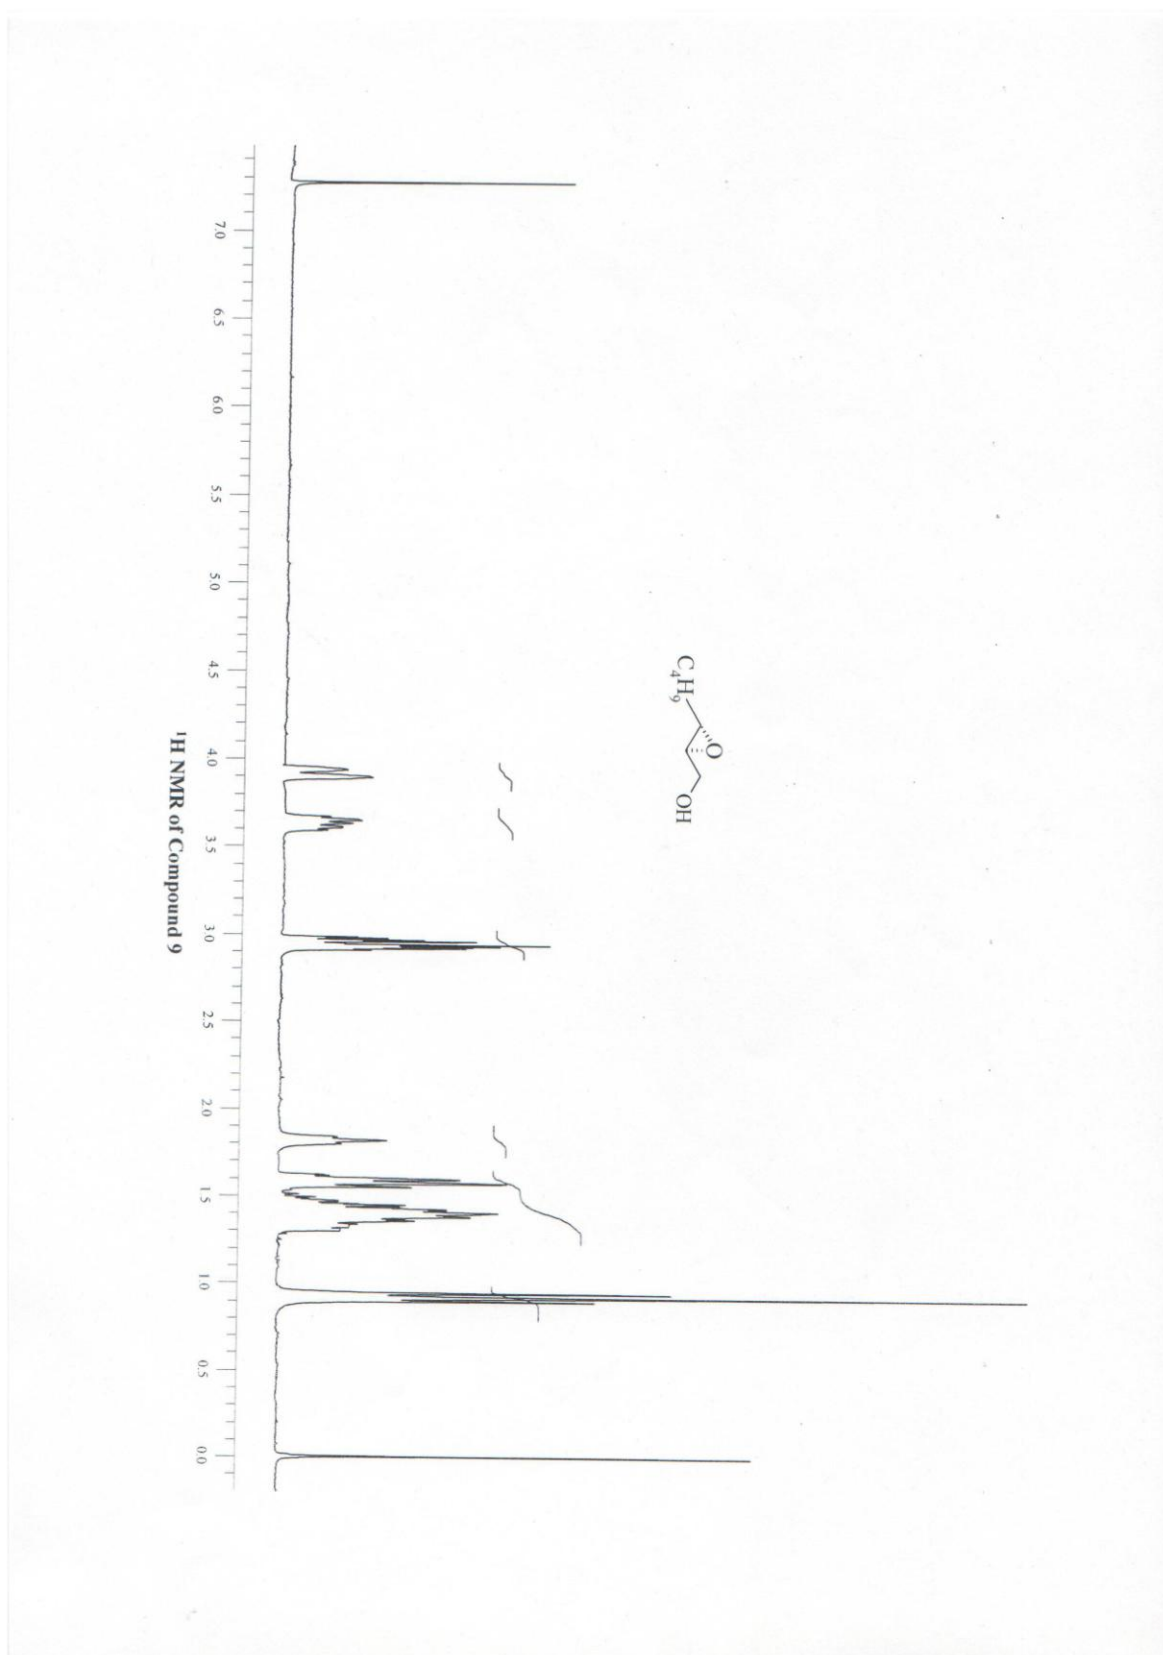

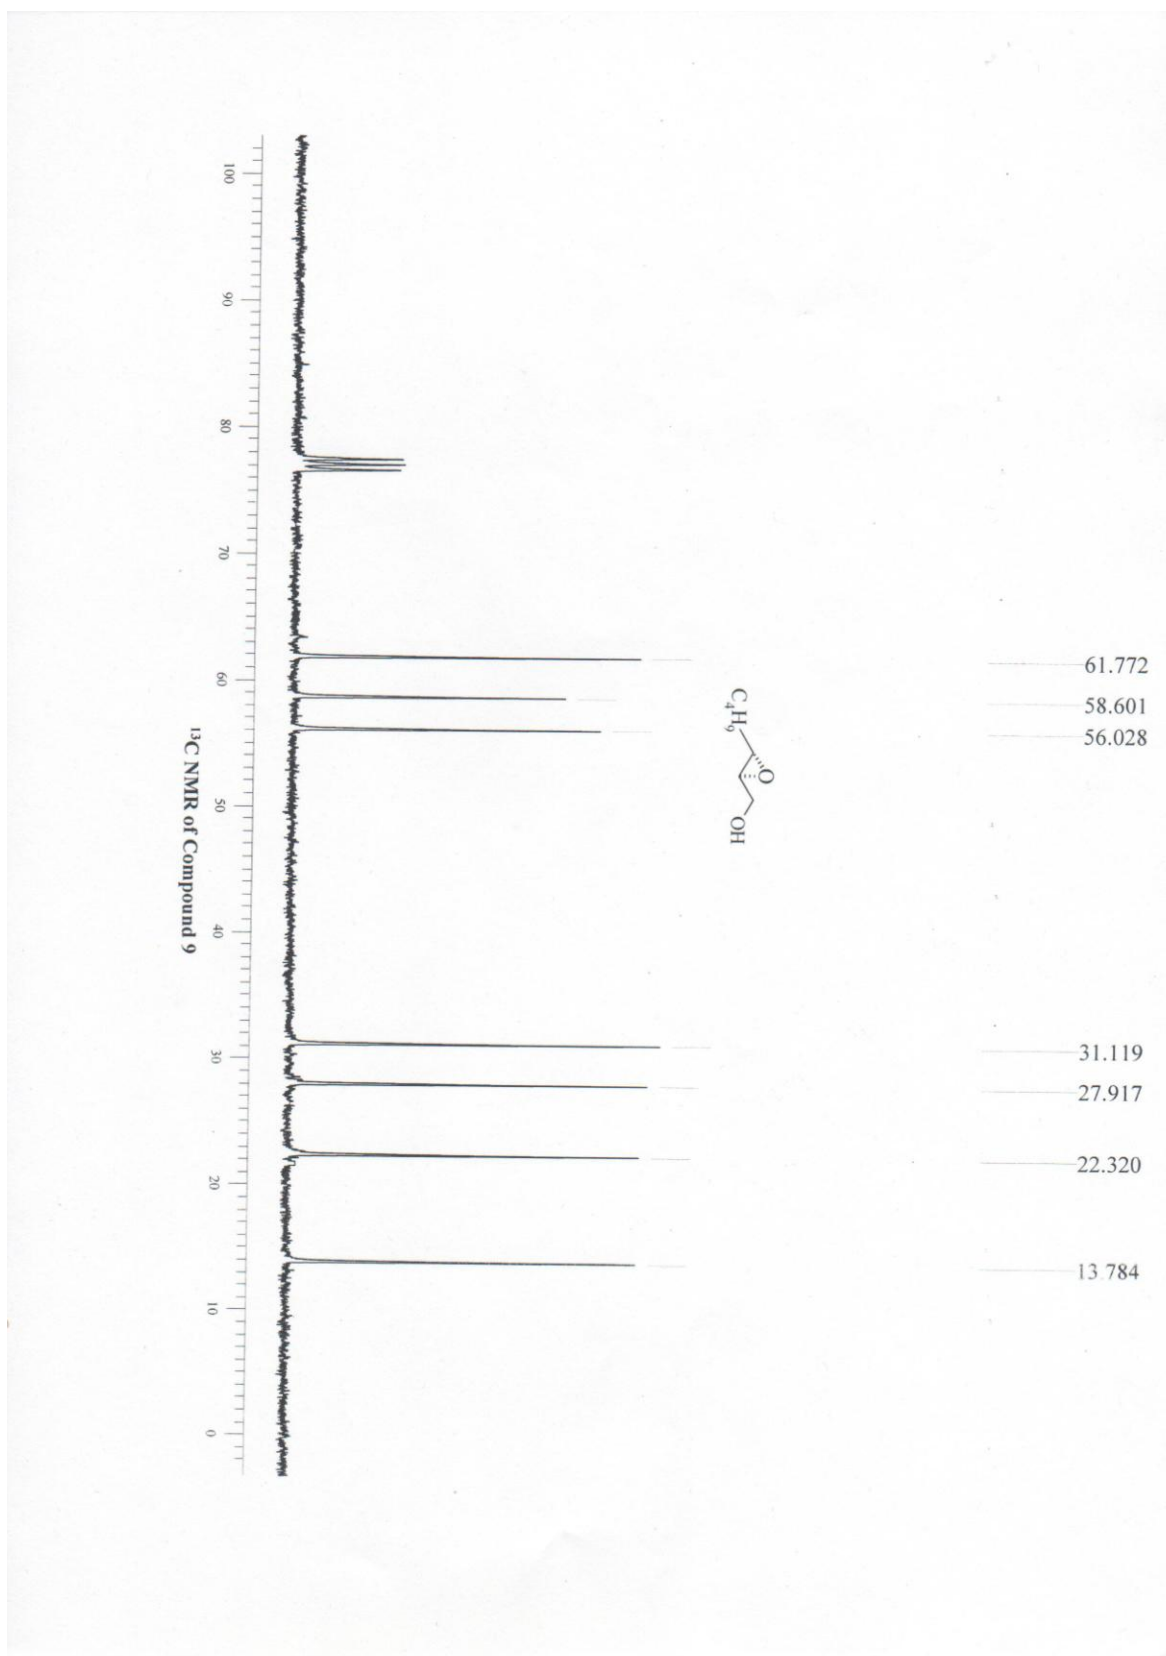

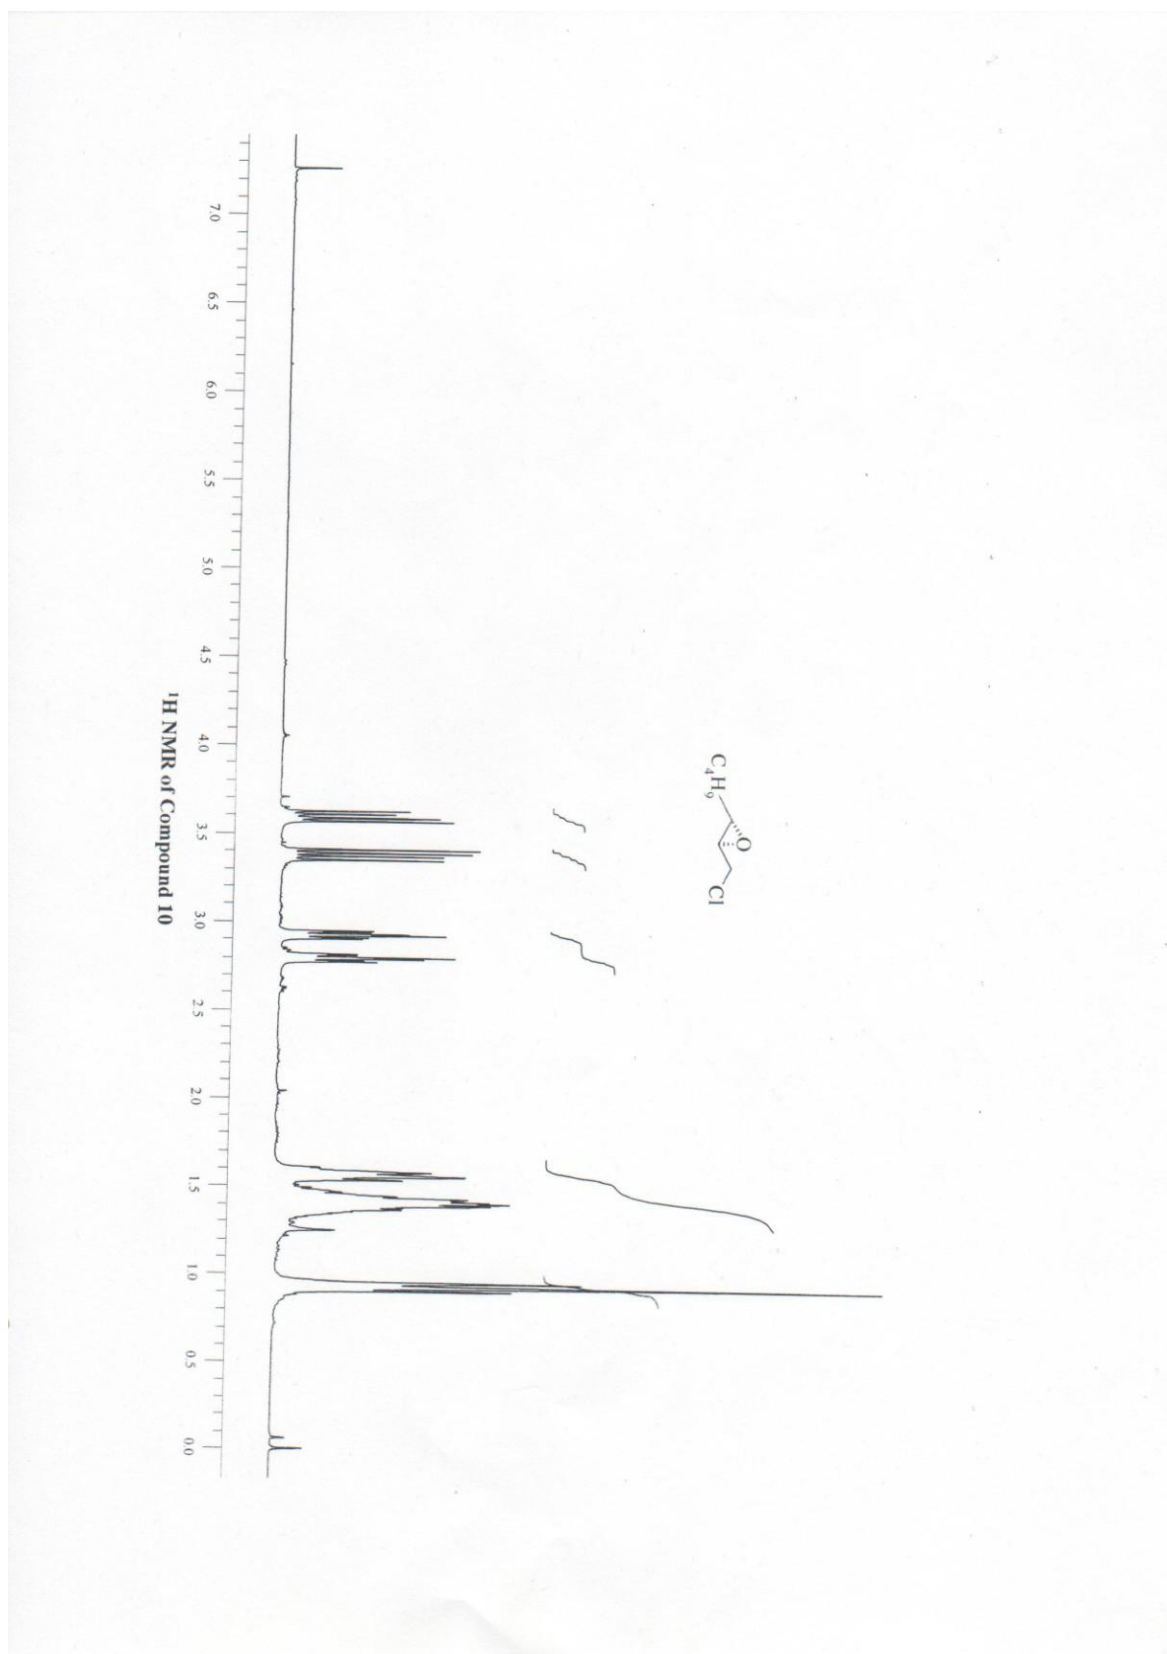

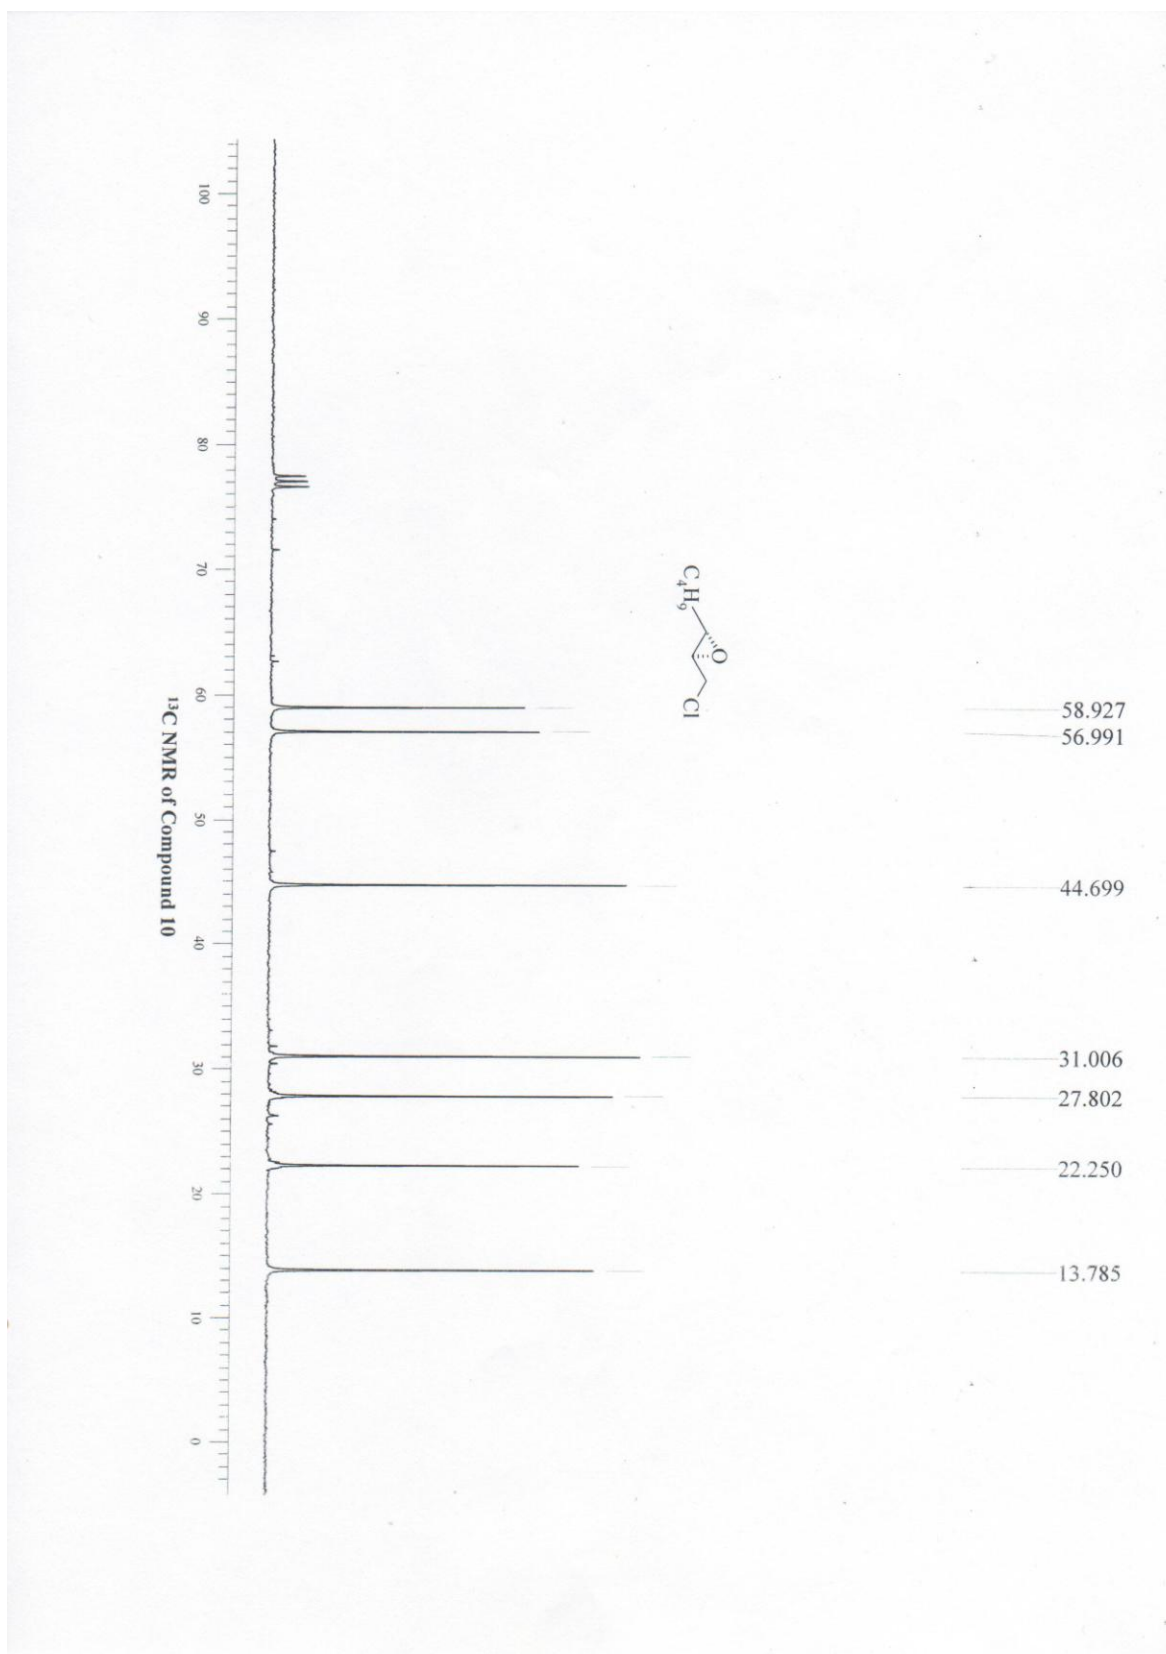

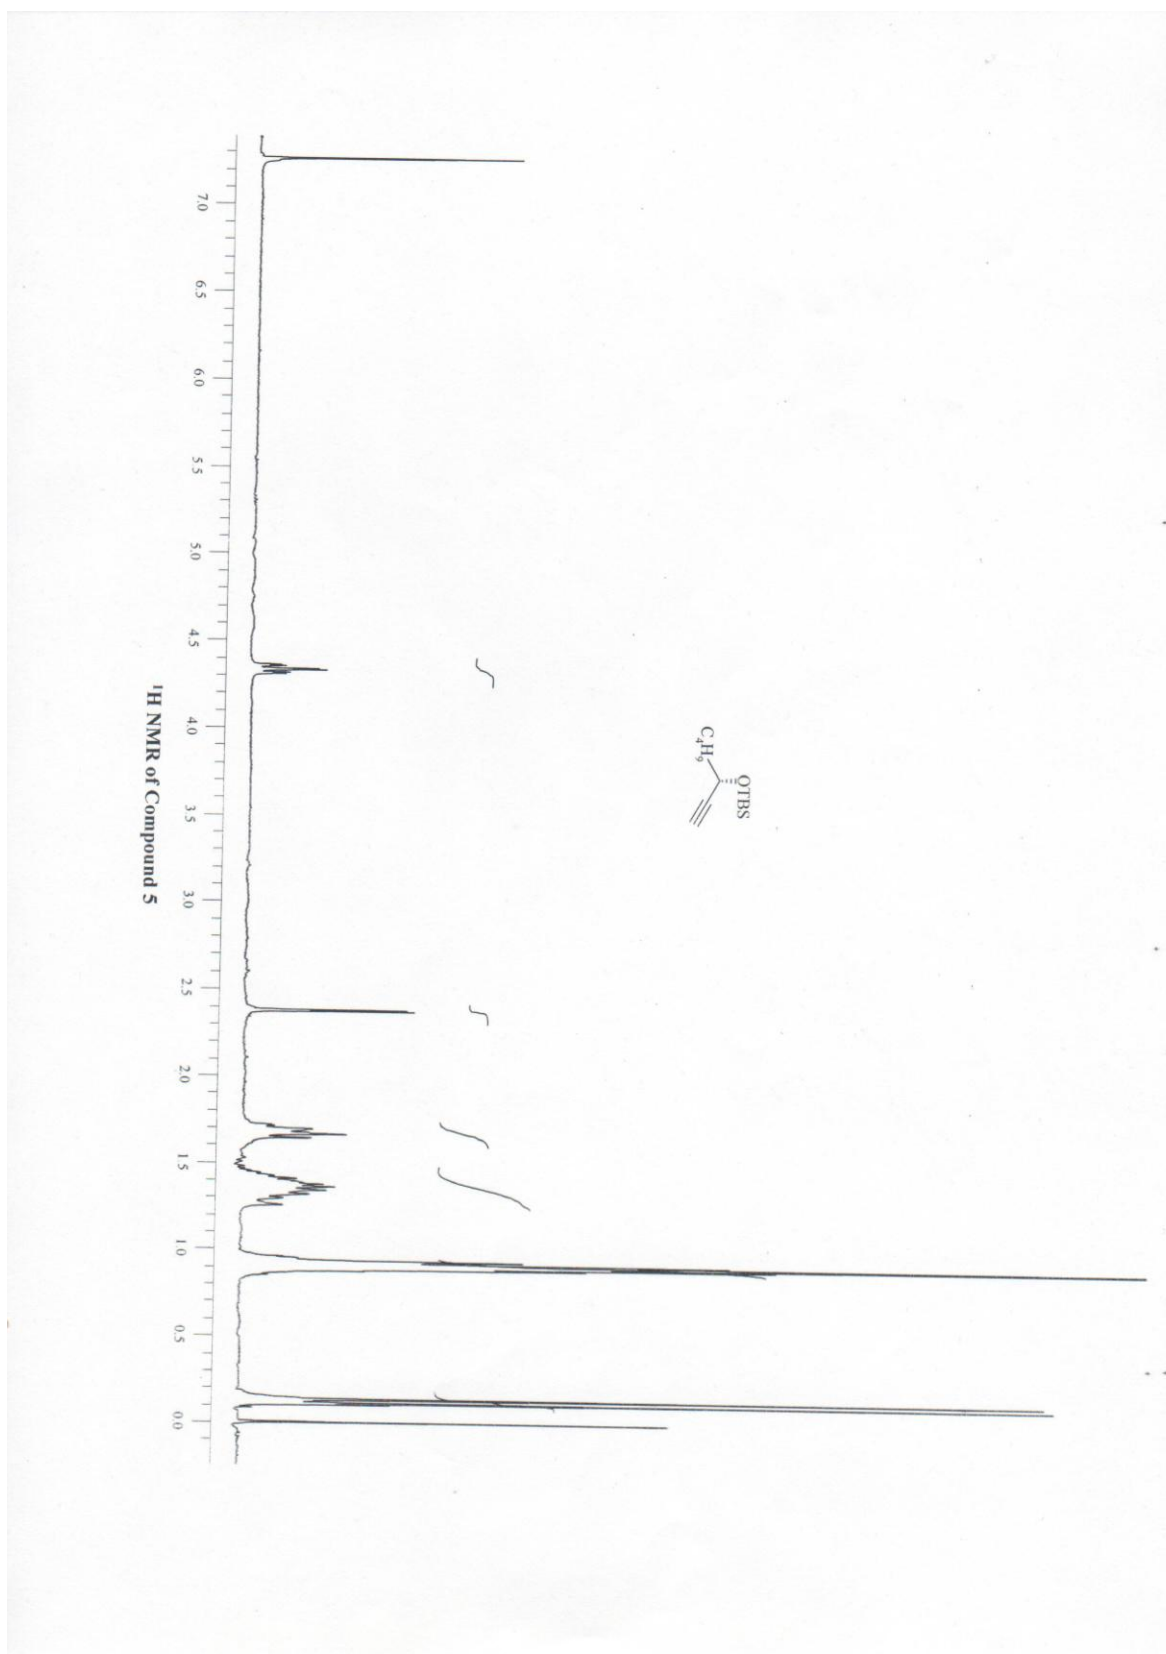



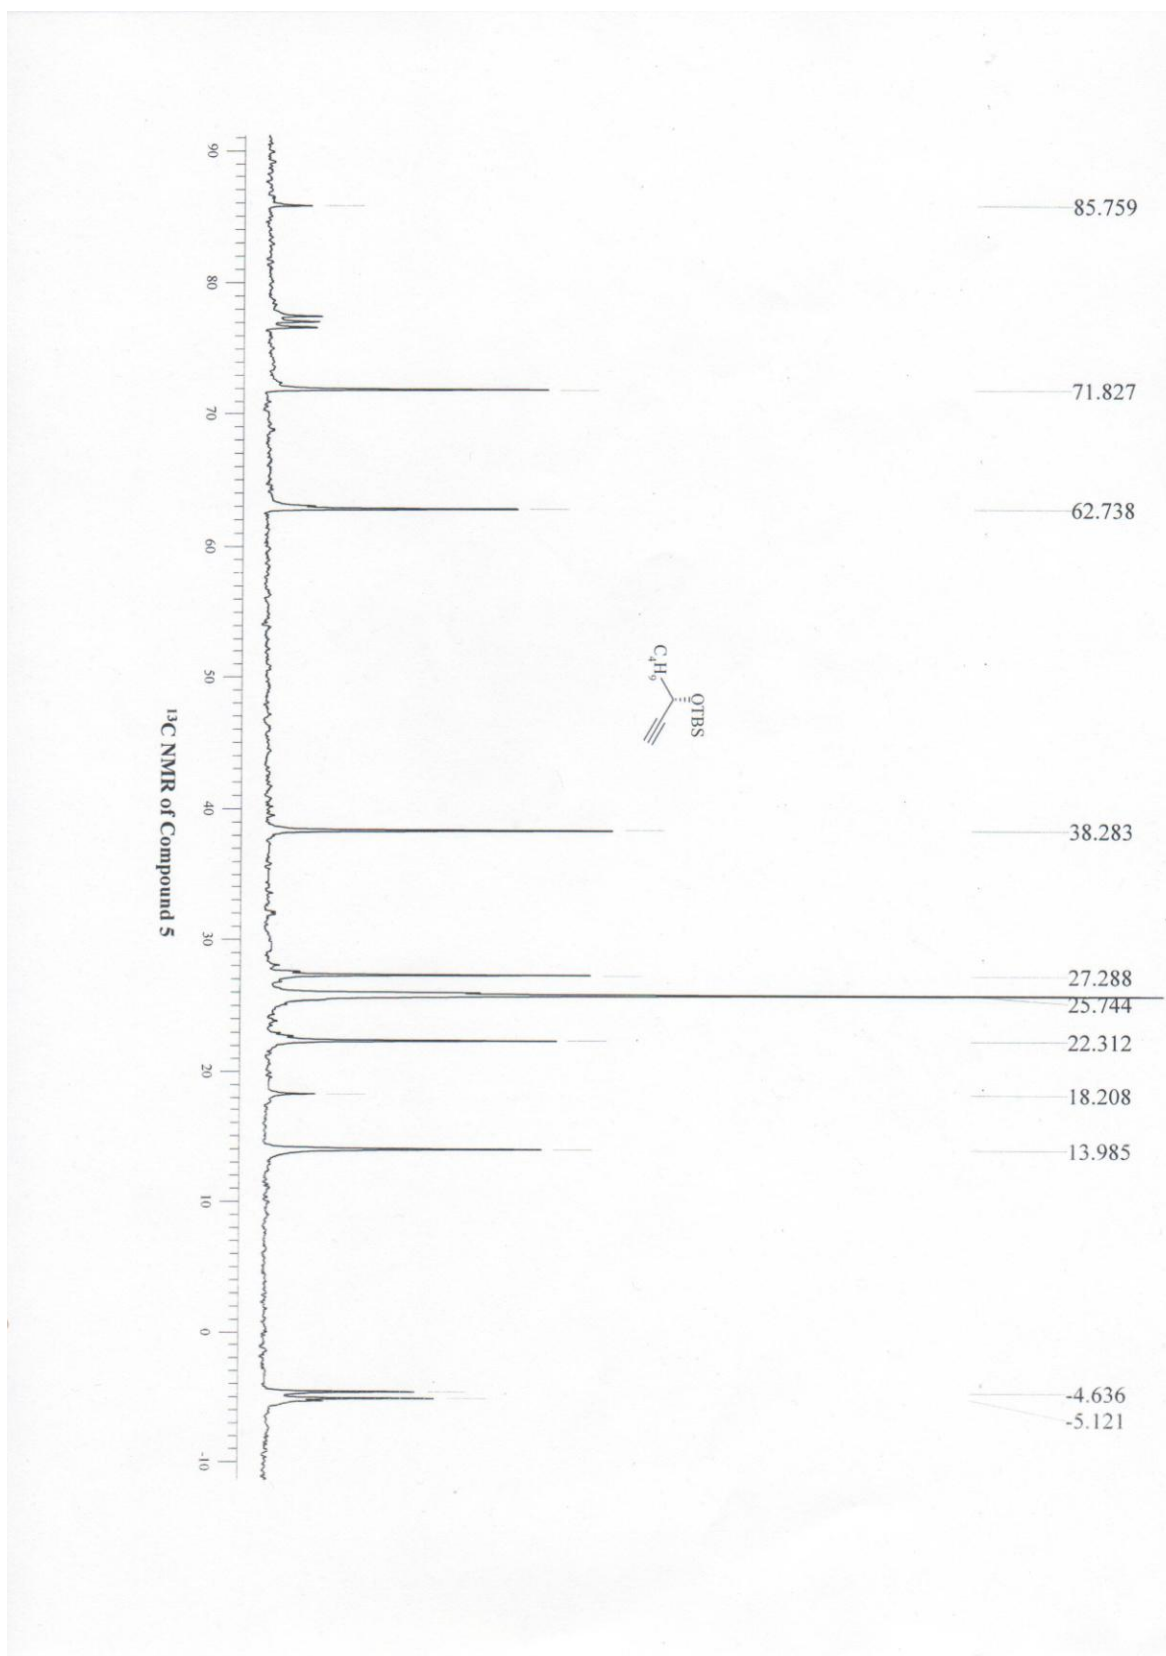

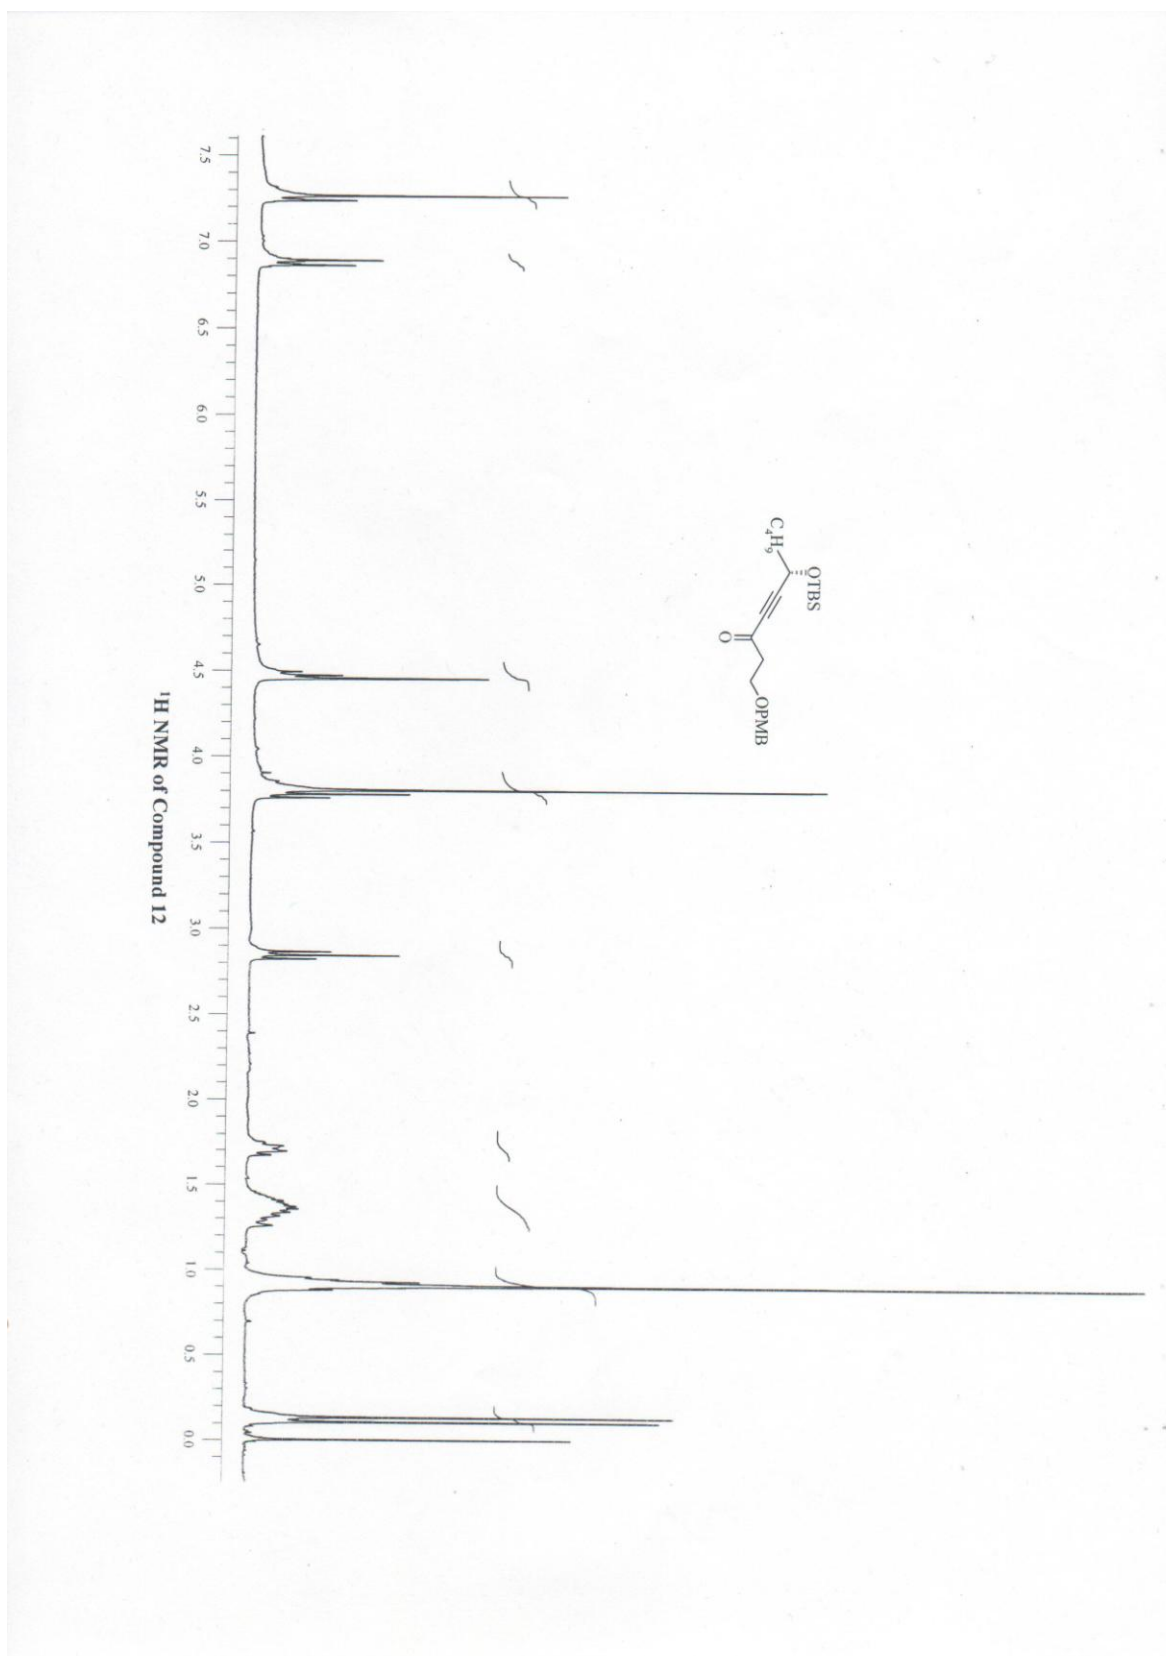

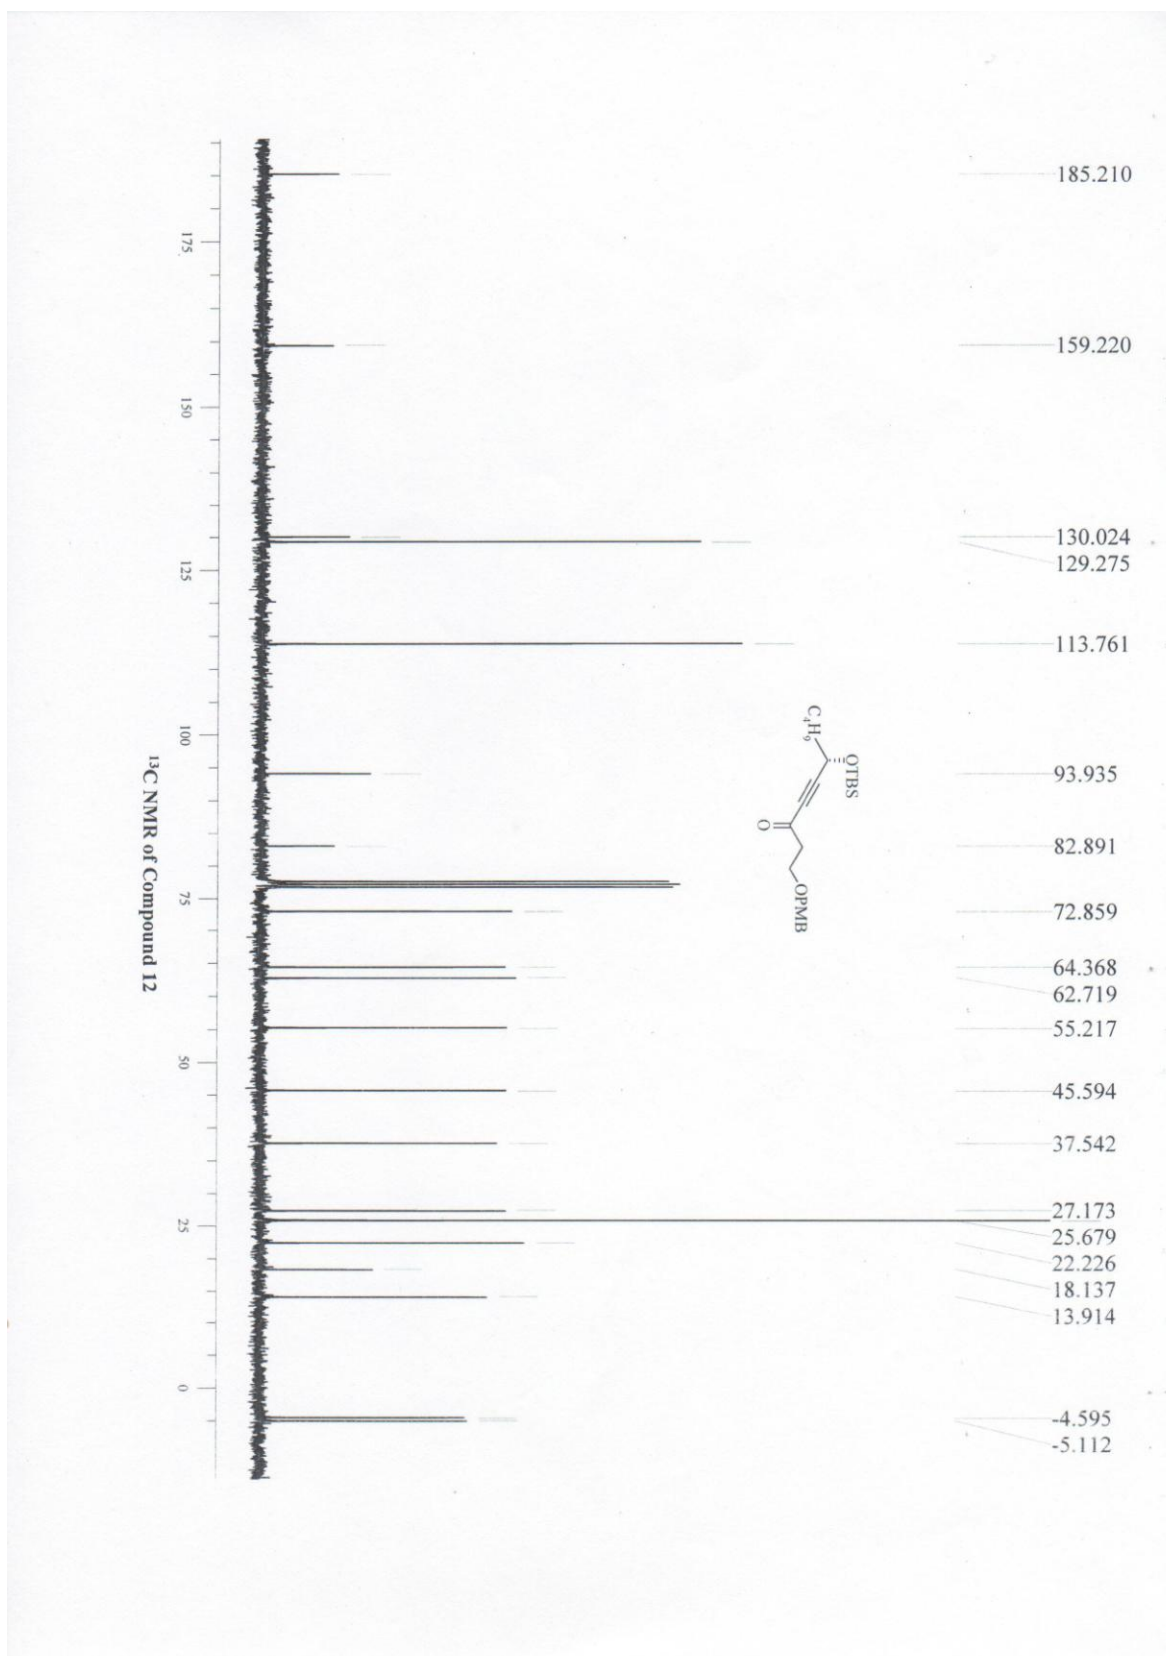

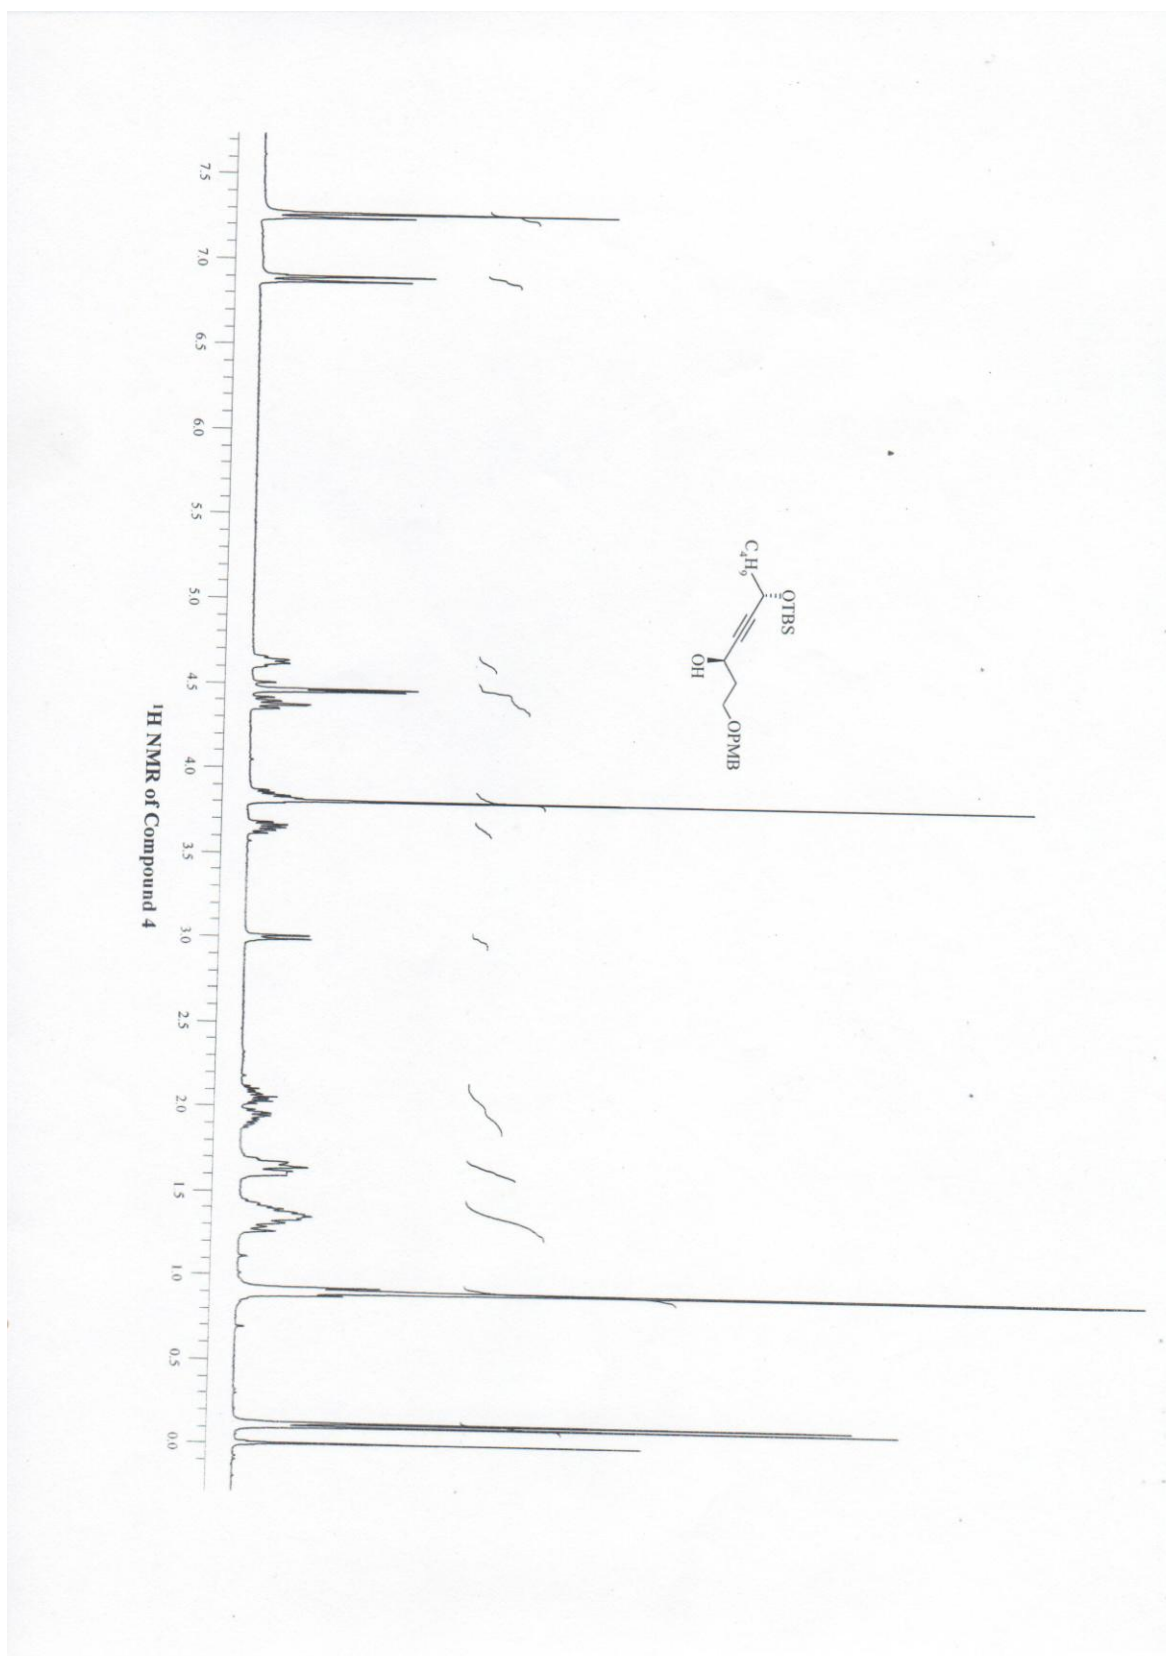

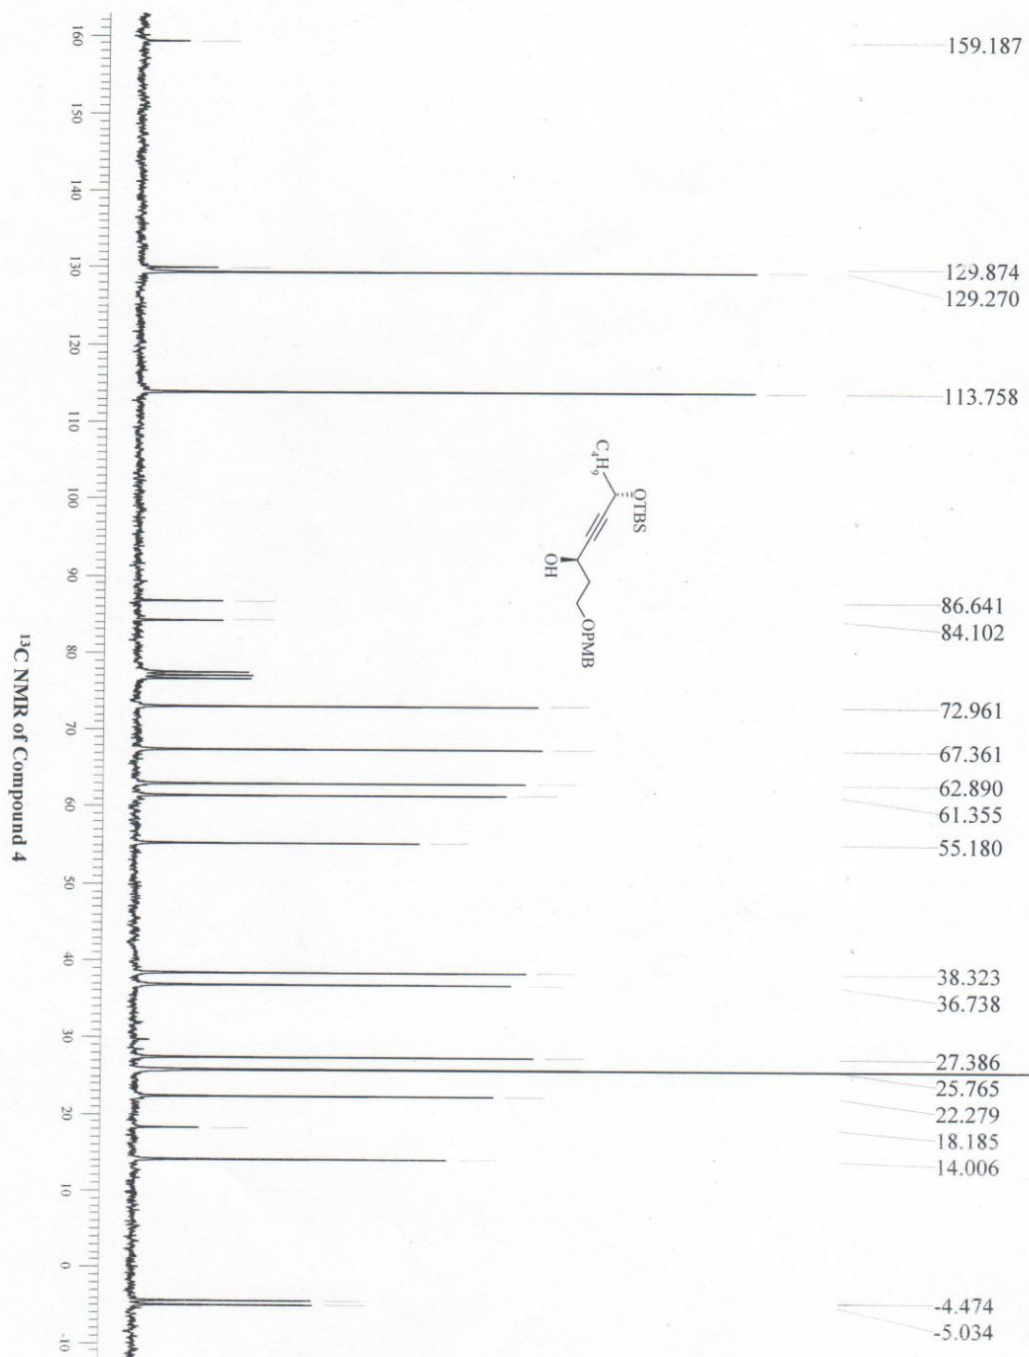

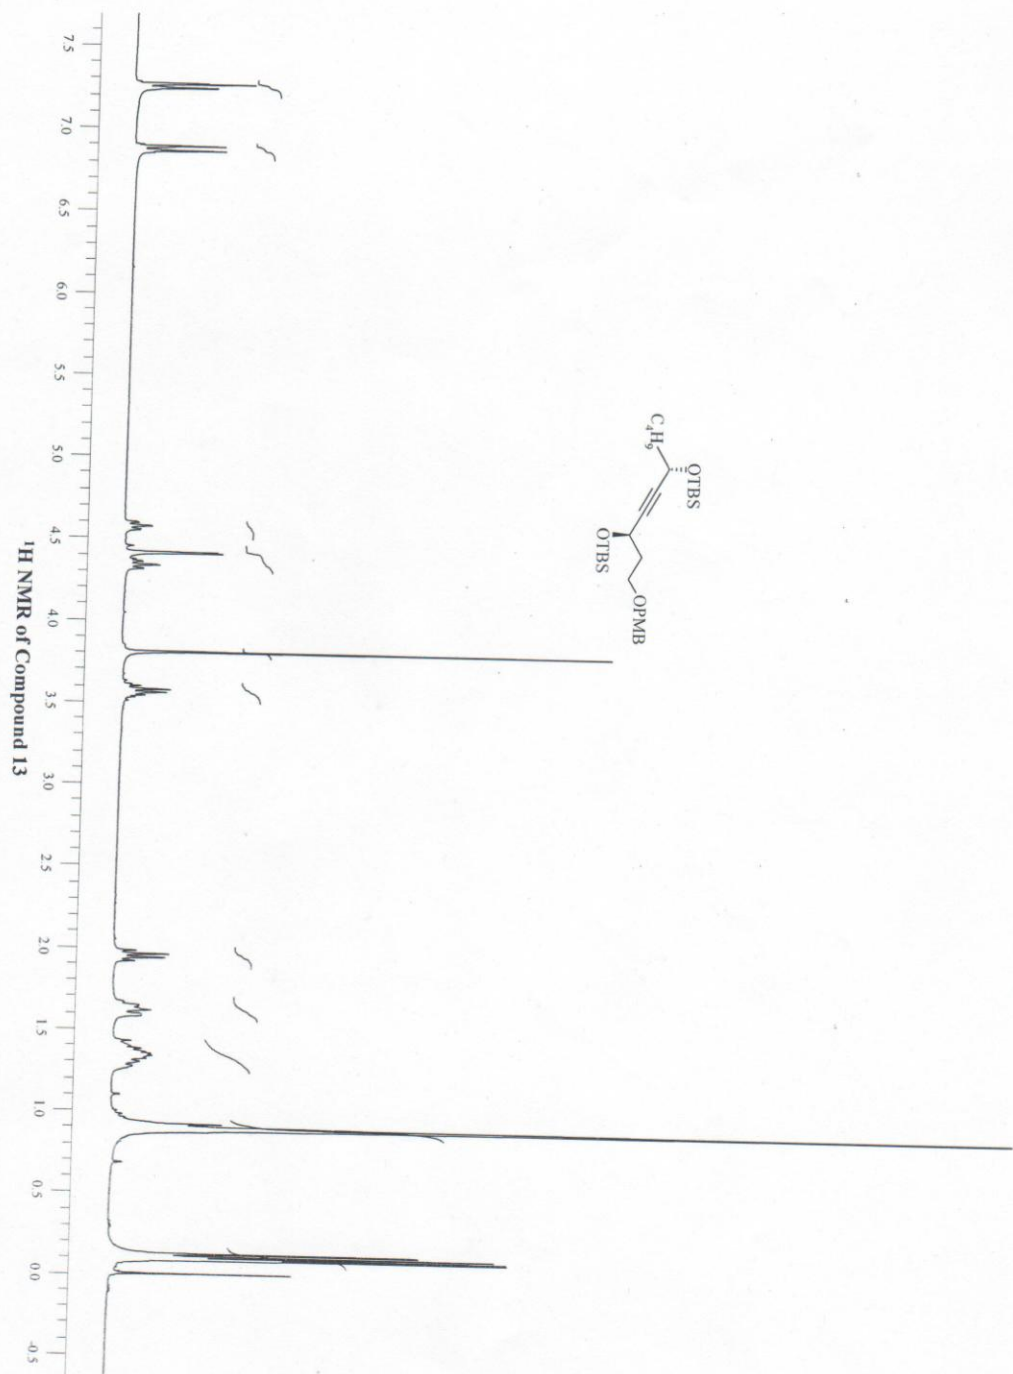



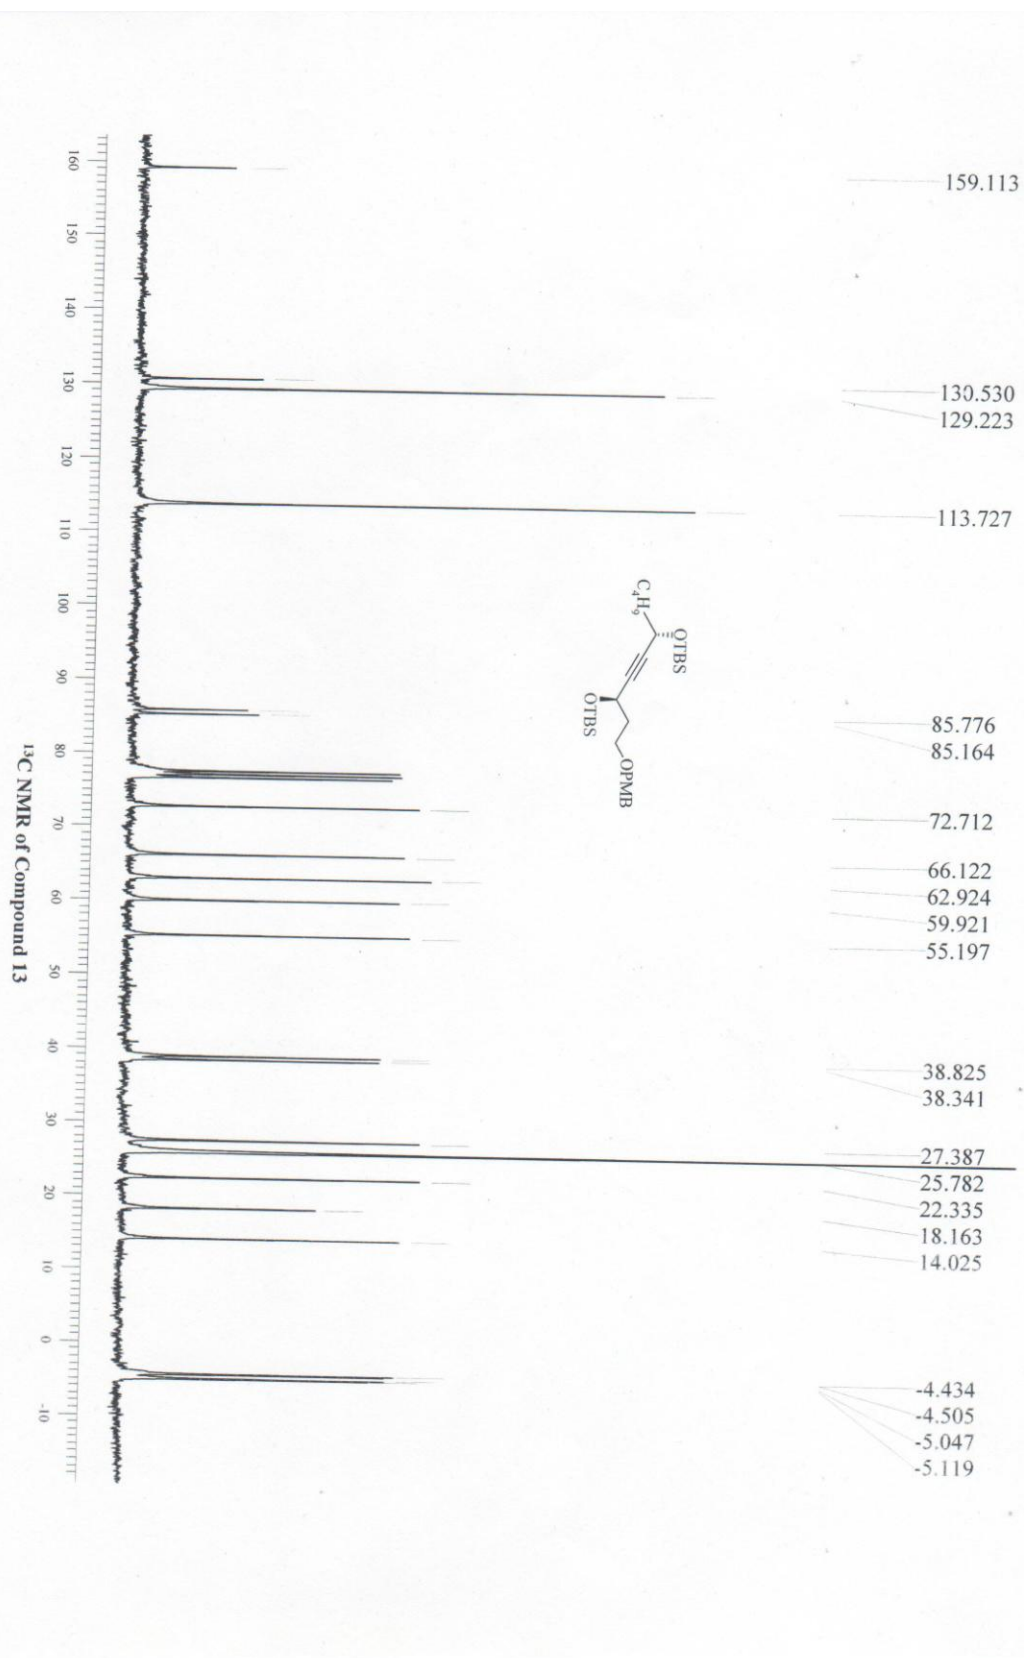

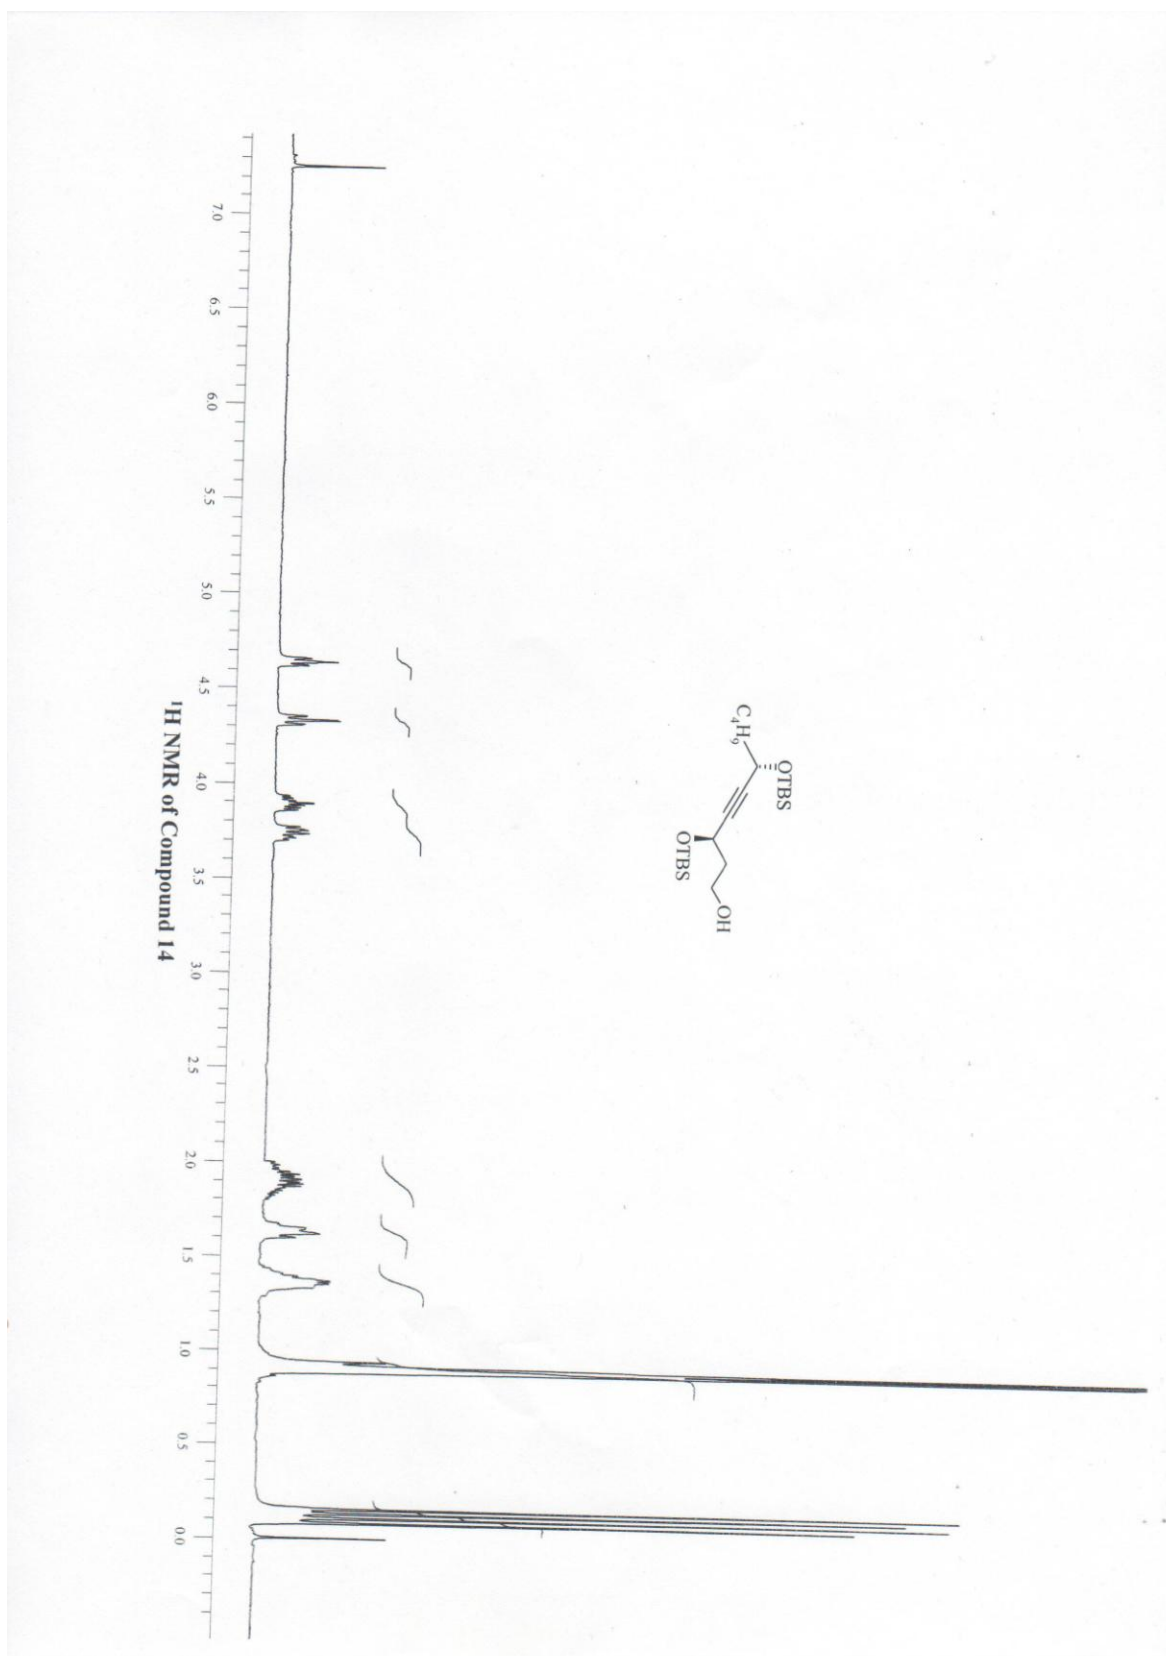



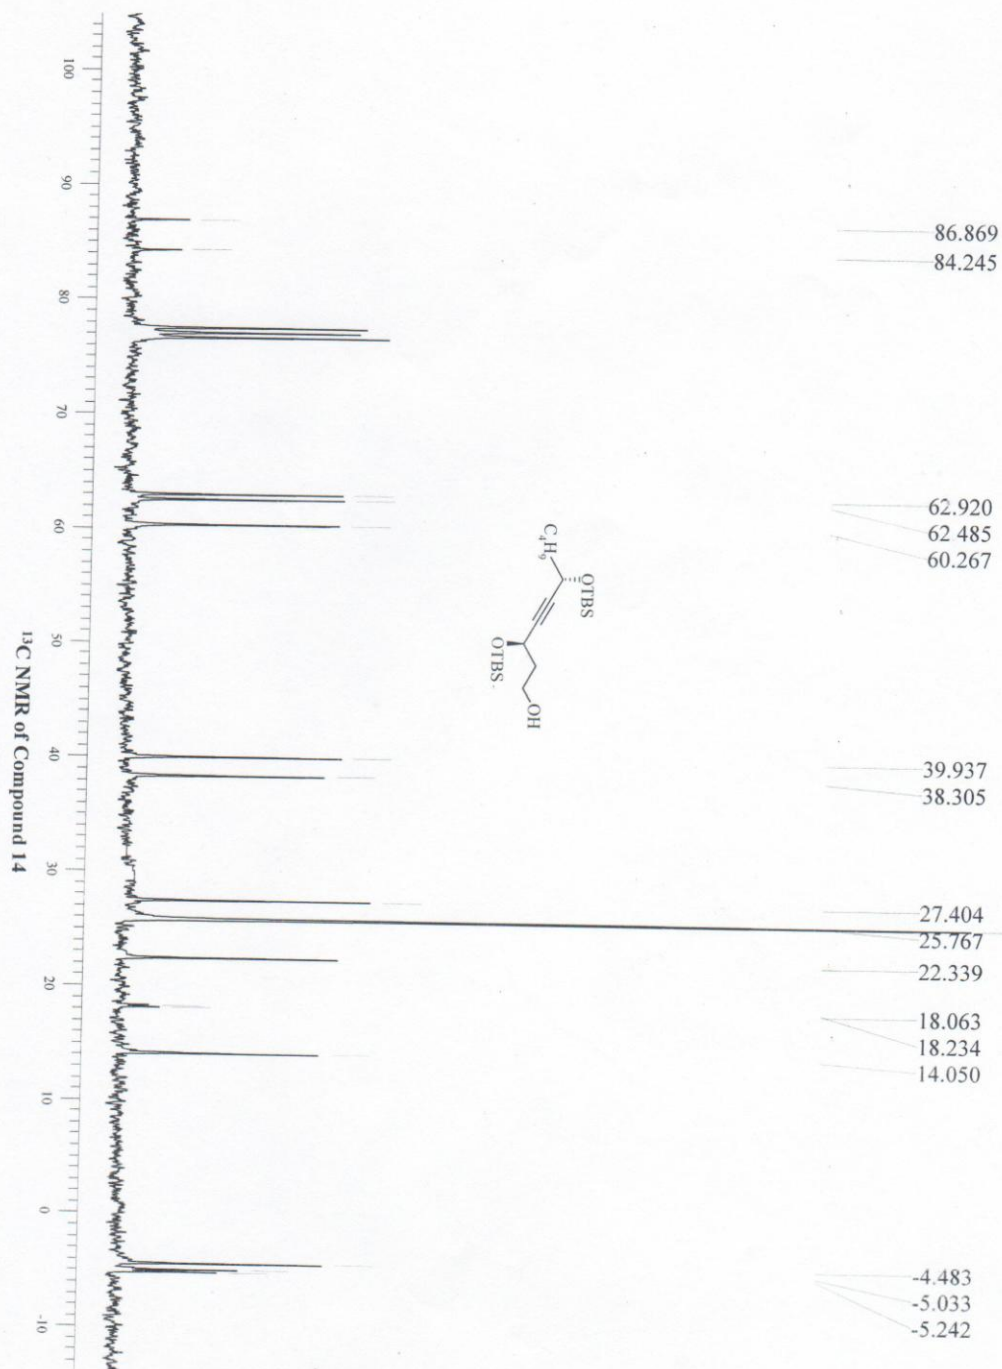

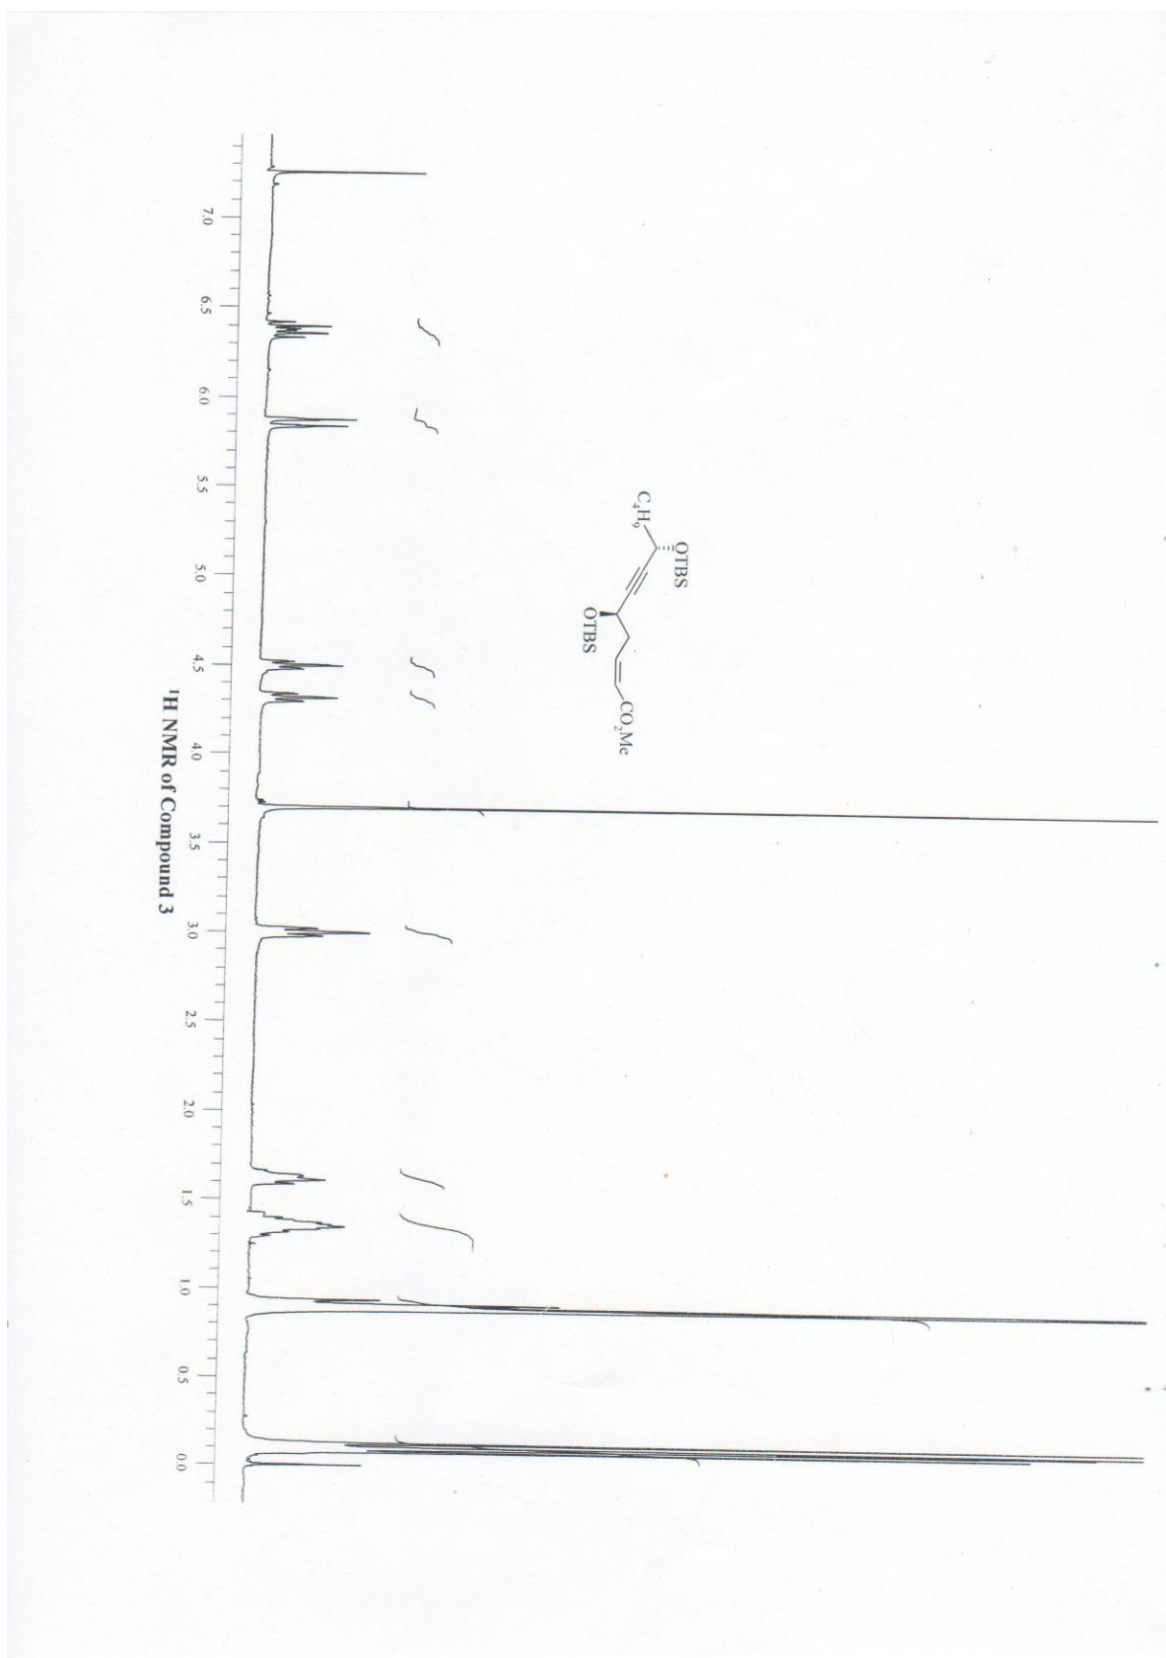

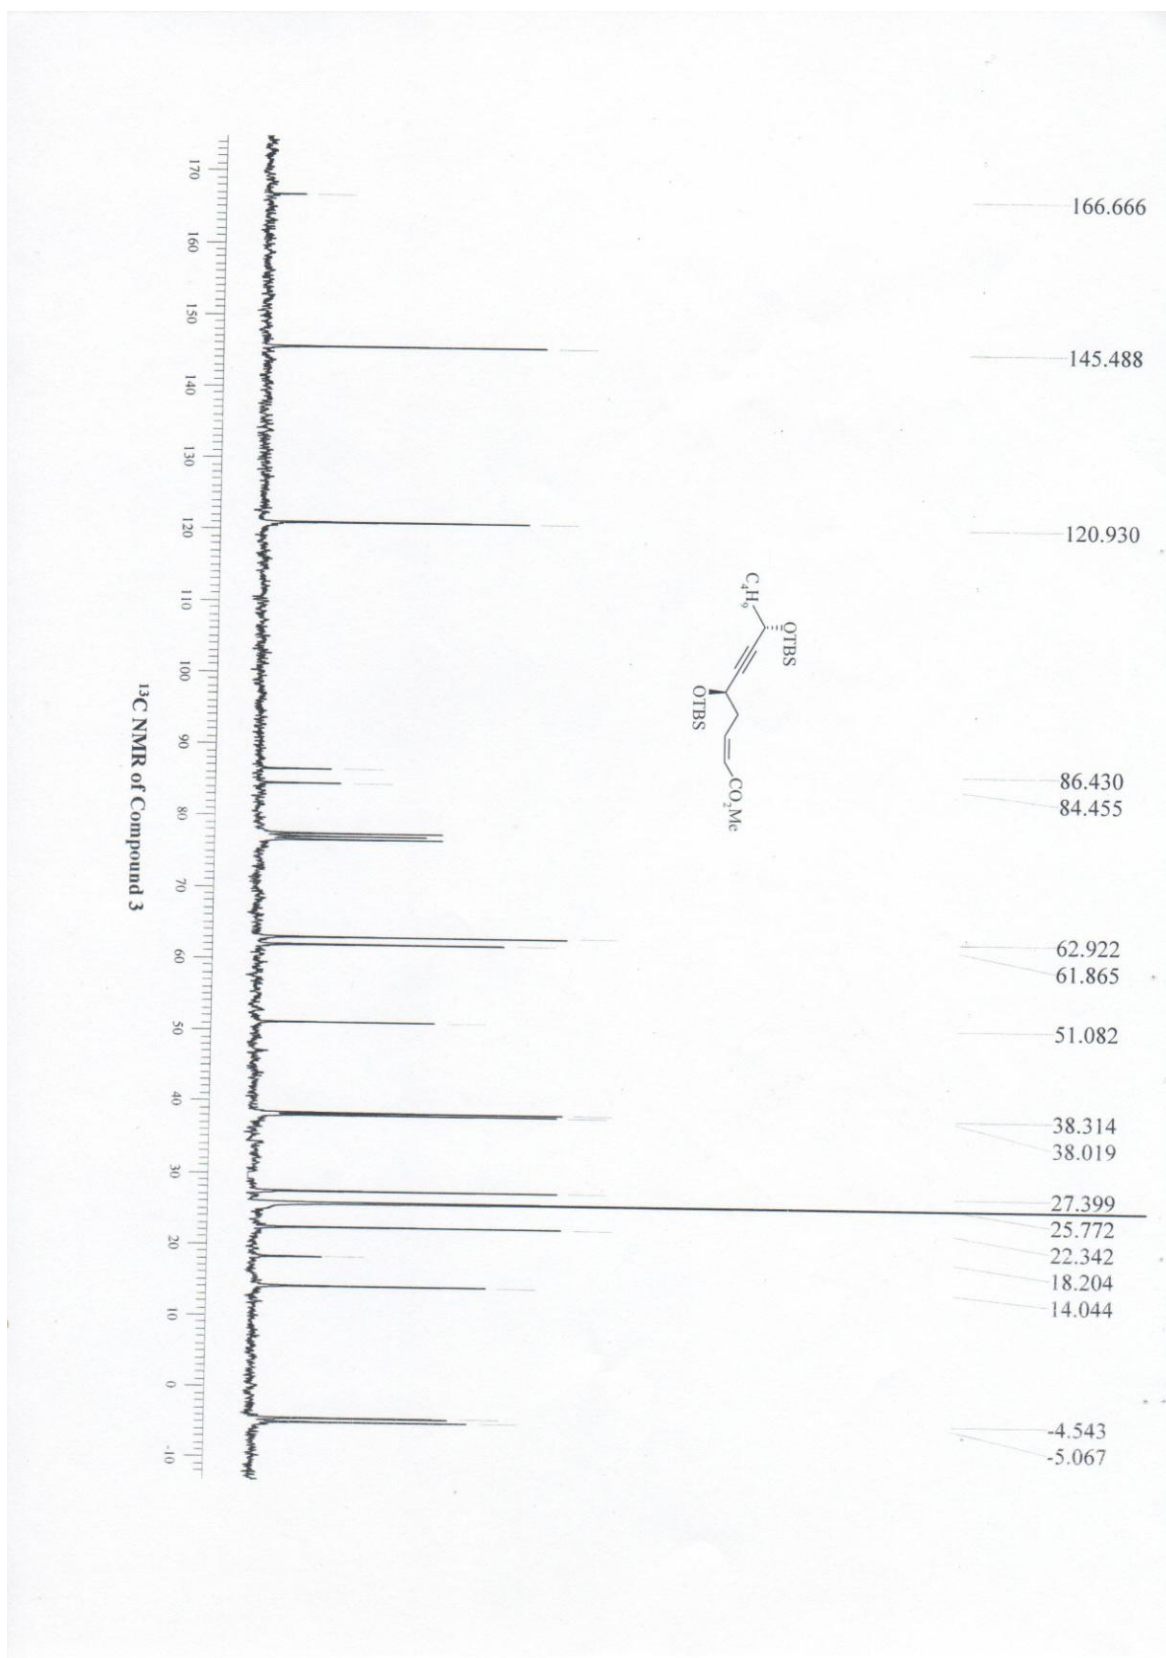

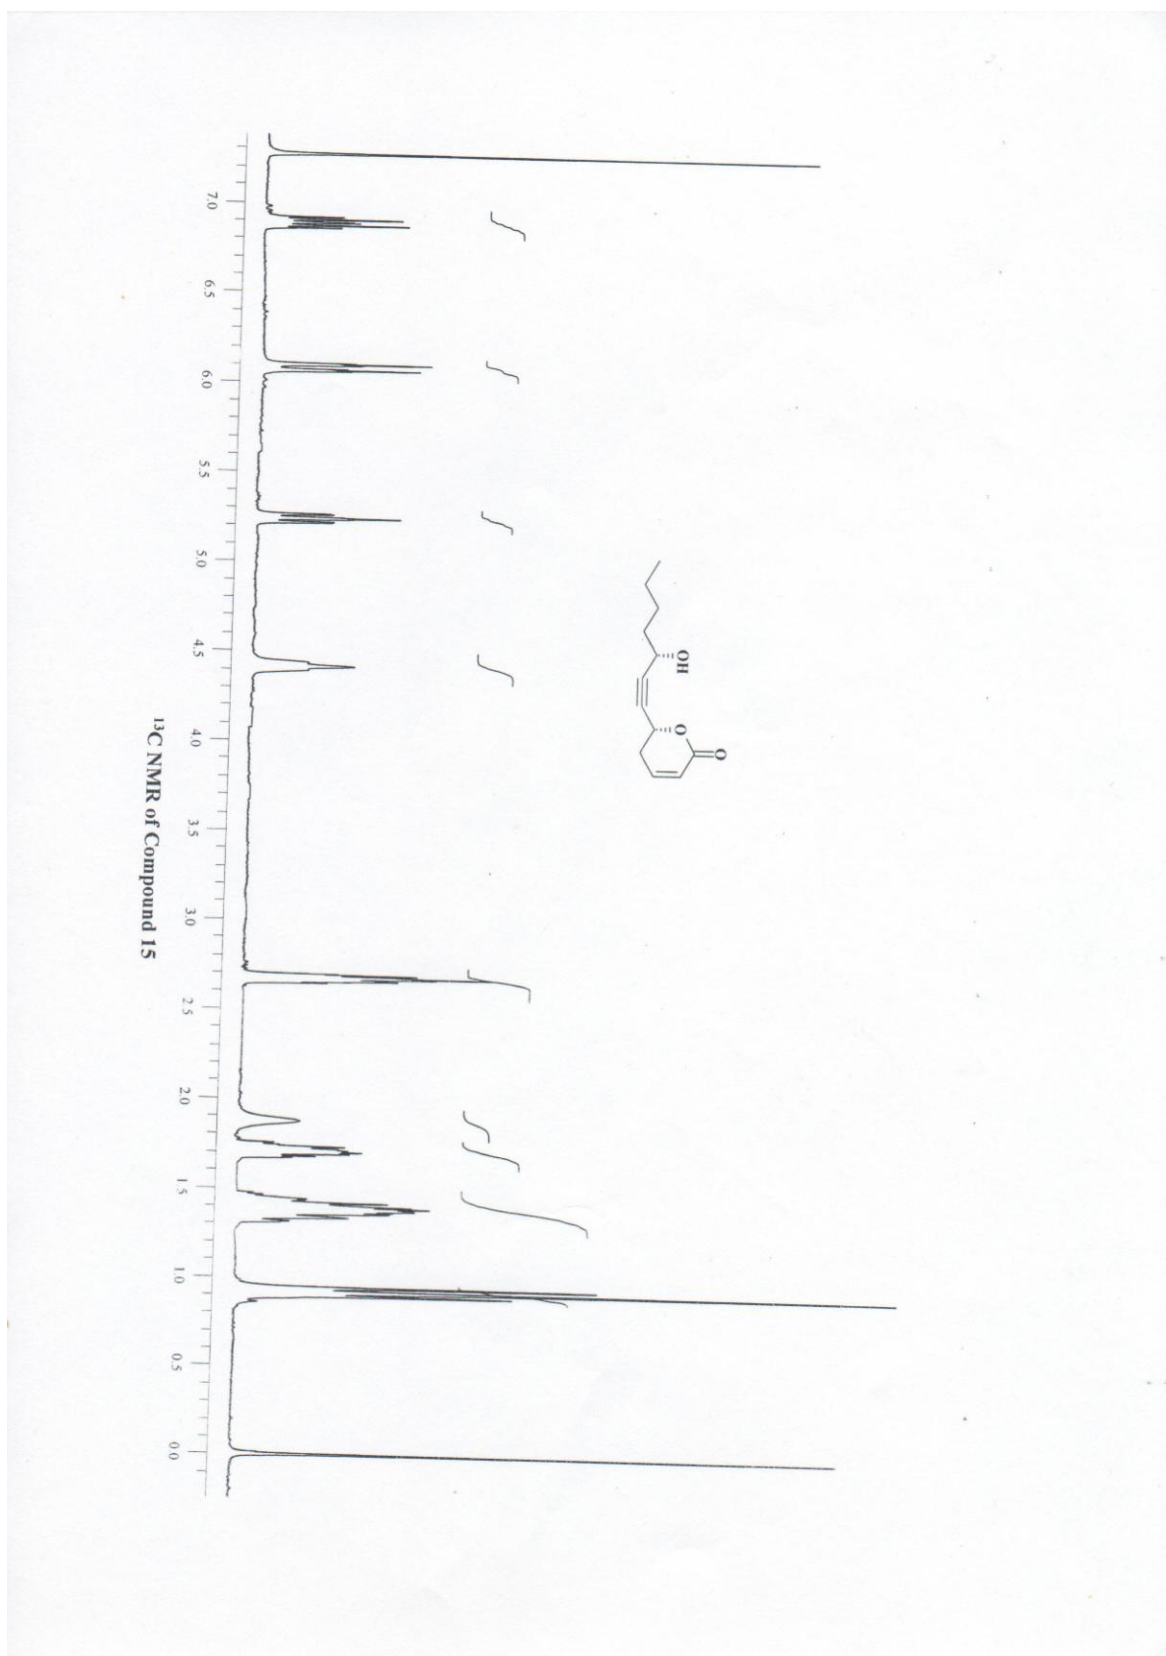

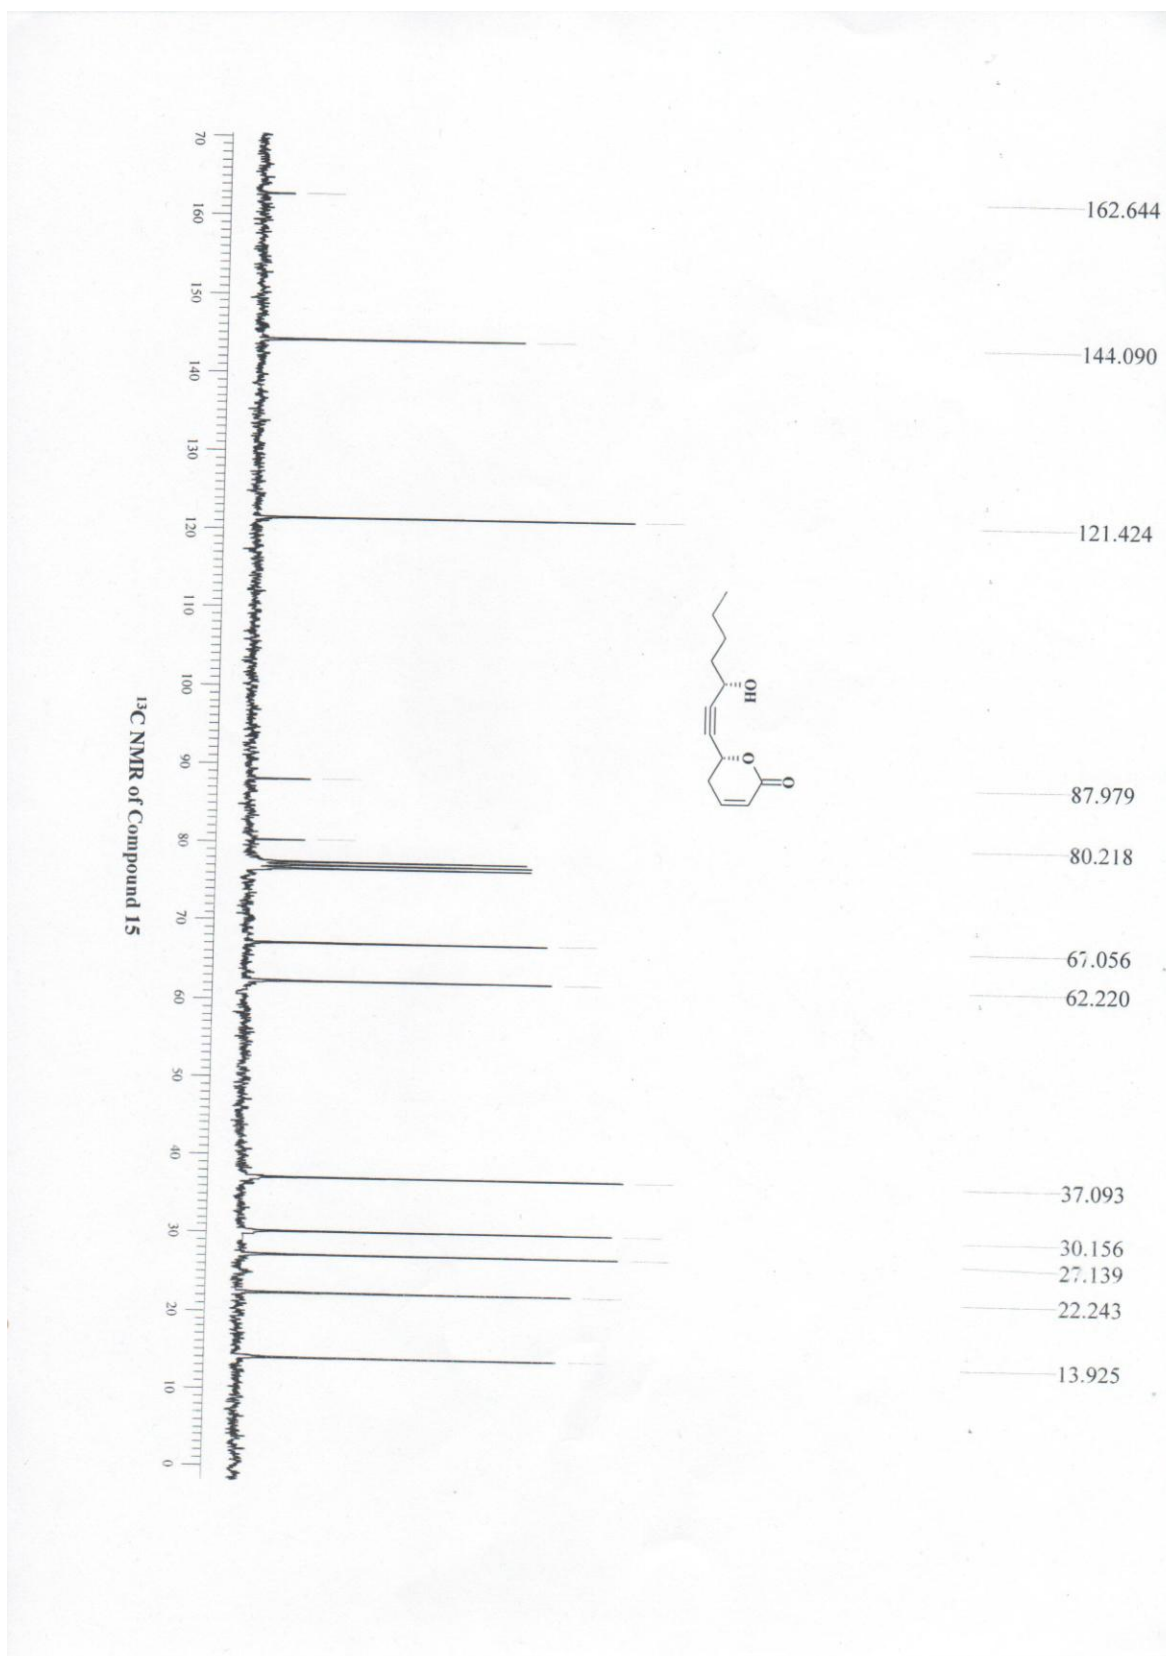



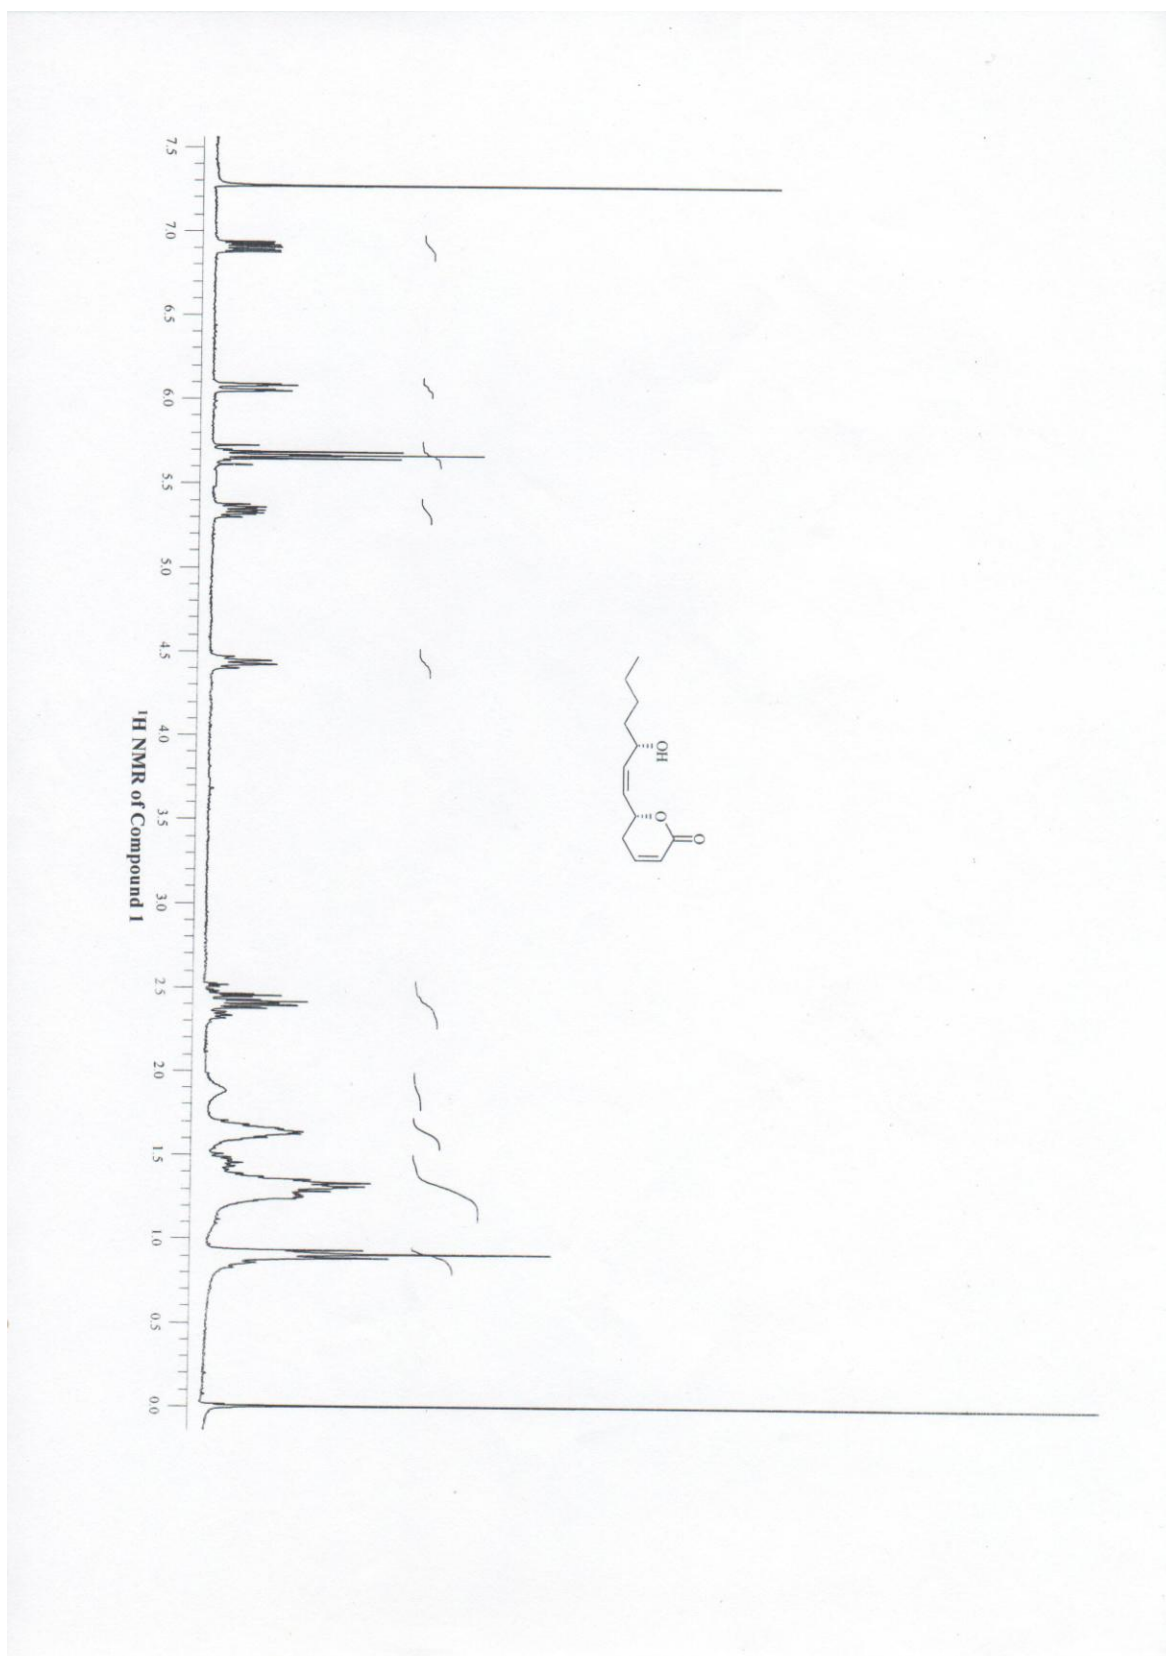

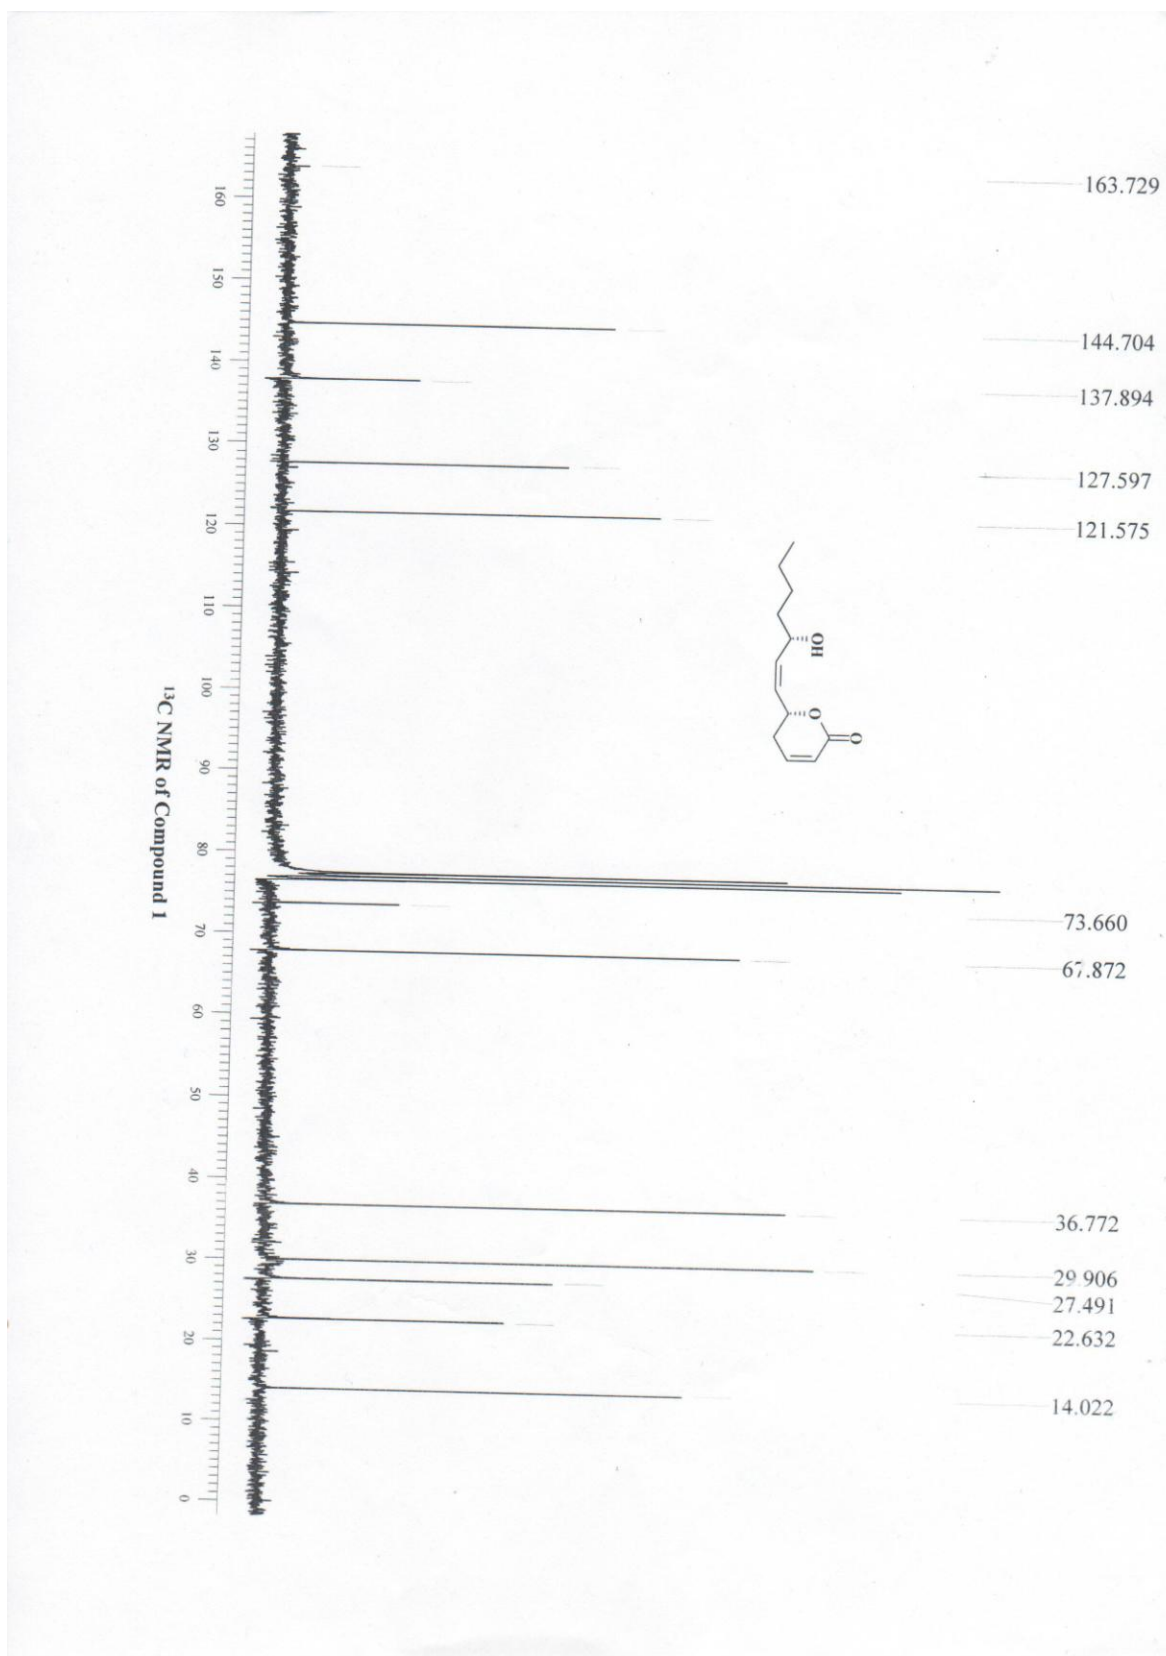

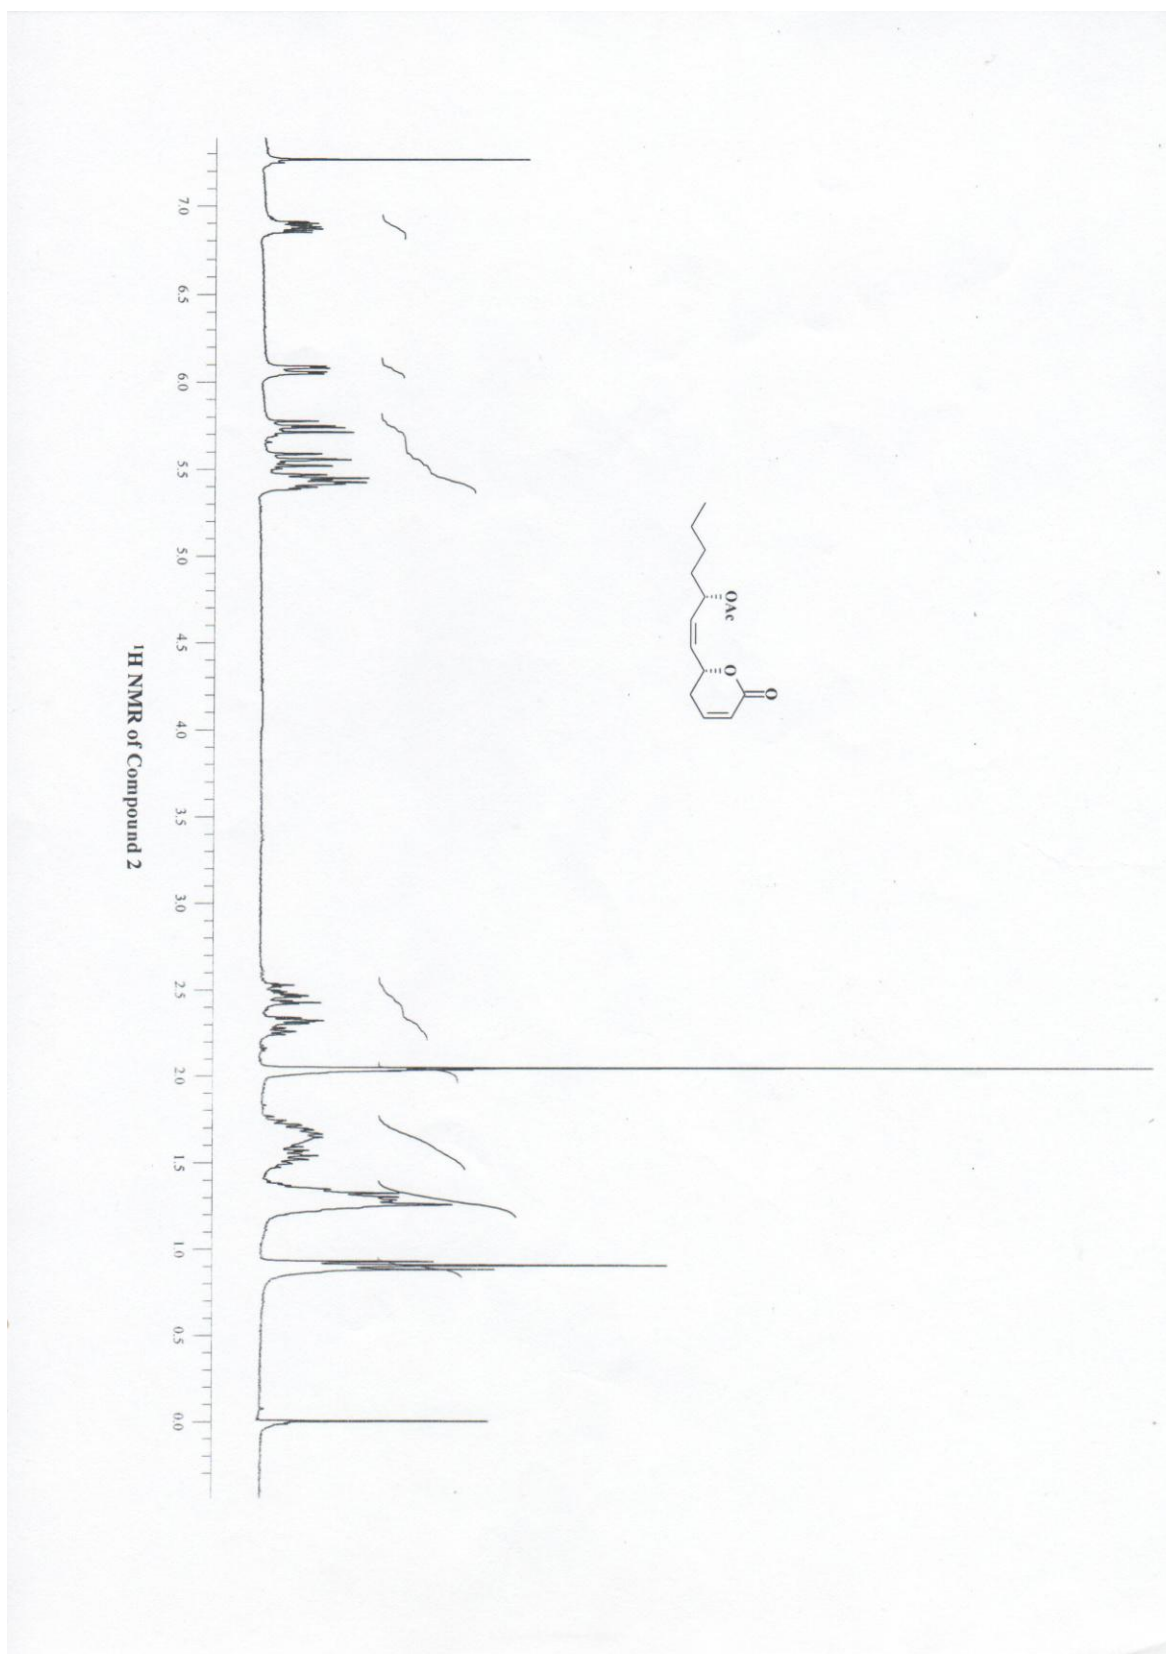



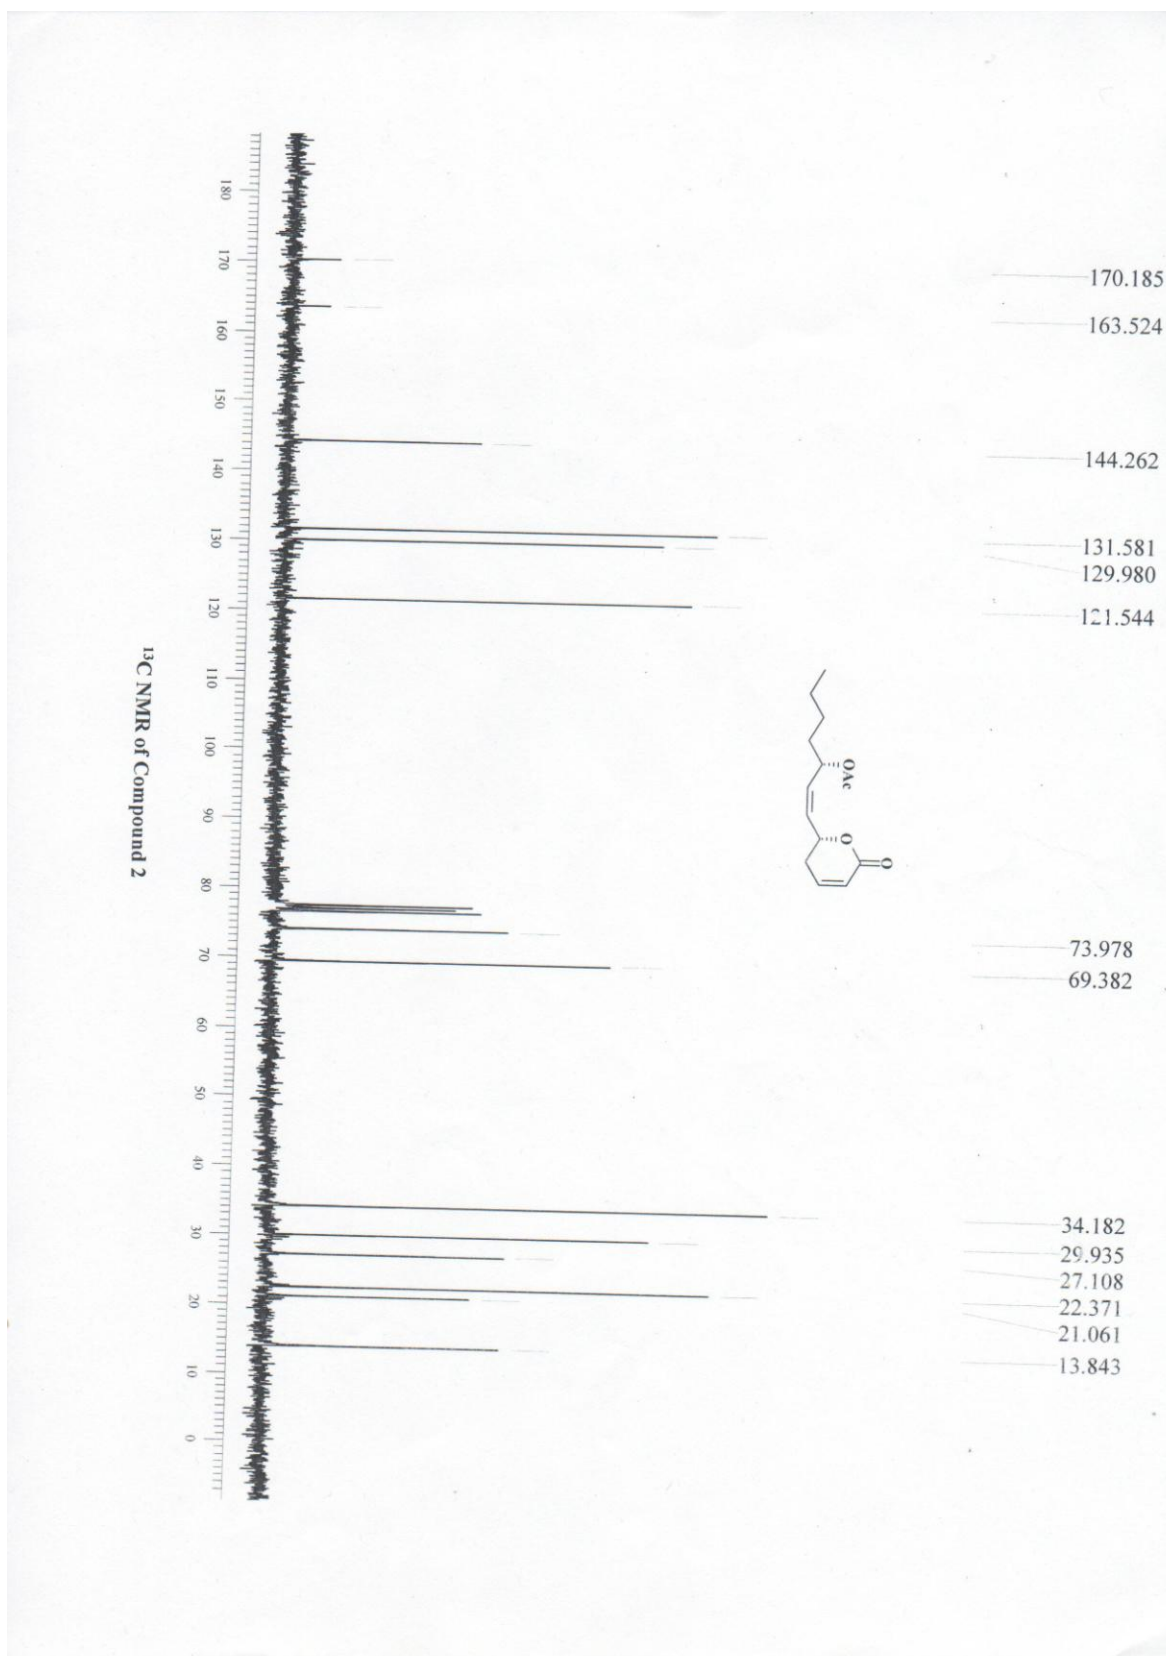

Supplement: c2ra20830j.pdf [file c2ra20830j.pdf]
